# Supplementary material
Source: PubMed Central journal article supplement (PMC4653208)
Supplement: pnas.1512392112.sapp.pdf [file pnas.1512392112.sapp.pdf]

# Weber et al., **CRISPR/Cas9 somatic multiplex-mutagenesis for high-throughput functional cancer genomics in mice**

## **Supplementary Methods**

**Cloning of *CRISPR-SB*.** To generate the *CRISPR-SB* vector, *pX330* (Addgene #42230 (1)) was sequentially opened with *AflIII* and *NotI* single cutters. *Sleeping Beauty (SB)* terminal repeats were amplified from *pTnori* (2) with *AflIII* and *NotI* overhangs, respectively and cloned into *pX330*.

**Design and cloning of single guide RNA (sgRNA) sequences.** The 20-bp sgRNA sequences were designed using the CRISPR design tool (<http://crispr.mit.edu>) (3) and are depicted in Table S6. For *Tet2* we used the sgRNA sequence as described in (4). Cloning of sgRNA sequences into *CRISPR-SB* was performed following protocols provided by the depositor of *pX330*.

**T7 Endonuclease 1 (T7E1) assay for identification of suitable sgRNAs for somatic mutagenesis.** The mouse pancreatic cancer cell line *PPT-53631* was cultured in DMEM (Sigma-Aldrich) containing 10% fetal bovine serum (Biochrom). Eighty thousand cells per well were sown in a 24-well-plate and transfected the next day with 450ng *CRISPR-SB* plasmid and 50ng *pcDNA<sup>TM</sup>6.2/EmGFP-Bsd/V5-DEST* (Life Technologies) using Lipofectamine® 2000 (Life Technologies). Twenty four hours after transfection, cells were selected with 5µg/mL Blasticidin (Life Technologies). After two days of selection, cells were lysed with DirectPCR lysis reagent (Viagen). PCR amplification of the target region was performed with Q5® High-Fidelity DNA Polymerase (New England Biolabs) using primers listed in Table S8. We purified PCR products by gel extraction (QIAquick Gel Extraction Kit, Qiagen) and denatured and reannealed 200ng of the purified PCR product in NEBuffer 2 (New England Biolabs) using a thermocycler. Hybridized PCR products were treated with 10U of T7E1 (New England Biolabs) at 37°C for 15min in a reaction volume of 20µL. Reactions were stopped by the addition of 2µL 0.5M EDTA and analyzed by electrophoresis using a 10% polyacrylamide gel. Indel frequency was calculated according to (5).

**Surveyor nuclease assay for determining indel frequency in targeted genes.** For Surveyor assays we used the mouse pancreatic cancer cell lines *PPT-53631* and *PPT-4072*, which were cultured in DMEM (Sigma-Aldrich) containing 10% fetal bovine serum (Biochrom). Eighty thousand cells per well were sown in a 24-well plate and transfected the next day with 450ng *CRISPR-SB* plasmid and 50ng *pcDNA™6.2/EmGFP-Bsd/V5-DEST* (Life Technologies) using Lipofectamine® 2000 (Life Technologies). Twenty four hours after transfection, cells were selected with 5µg/mL Blasticidin (Life Technologies). After two days of selection, cells were lysed with DirectPCR lysis reagent (Viagen). Amplifications of the target regions were performed with TaKaRa Ex Taq DNA Polymerase (Clontech) using primers listed in Table S8. PCR products were denatured and reannealed in NEBuffer 2 (New England Biolabs) using a thermocycler. Surveyor nuclease reaction was performed according to manufacturer's instructions (Transgenomic) and indel frequency was calculated according to (5).

**Animal Experiments.** For hydrodynamic tail vein injections (HTVI), 10µg/mL *hSB5 transposase* (2) and ten (eighteen) *CRISPR-SB* sgRNA vectors (10µg/mL in total) were dissolved in 2mL 0.9% saline and injected into the tail vein of eight weeks old mice over six to ten seconds (2). In order to accelerate liver tumorigenesis, we used *Alb-Cre;Kras<sup>LSL-G12D/+</sup>* mice (6, 7). For chemical acceleration of tumorigenesis, wild type mice were treated nine times with a weekly intraperitoneal injection of 1µL/g body weight 10% carbon tetrachloride (CCl<sub>4</sub>, Sigma-Aldrich) in Corn Oil (Sigma-Aldrich) beginning two weeks after HTVI. Mice were monitored for tumor development by regular magnetic resonance imaging (MRI) screening, starting at 20 weeks post HTVI. Animals were sacrificed as soon as hepatic tumors were diagnosed or when signs of sickness were apparent (in one case of early onset metastasized cancer at 20 weeks prior to MRI screening; see data in Figure 4).

For subcutaneous implantation of cell lines derived from mouse primary hepatic tumors, trypsinized cells were washed twice with DPBS (Life Technologies) and counted using a hemocytometer. Concentration was adjusted to  $3.3 \times 10^6$  cells per mL DPBS and 150µL cell suspension ( $5 \times 10^5$  cells) was subcutaneously injected into the right and left flank of NOD scid gamma (NOD.Cg-*Prkdc<sup>scid</sup> Il2rg<sup>tm1Wjl</sup>/SzJ*) mice using a 1mL syringe with a 27 gauge needle. Mice were monitored regularly for general health and tumor growth and were sacrificed once tumors reached a size of 1cm in diameter (about two weeks post implantation).

All animal studies were conducted in compliance with European guidelines for the care and use of laboratory animals and were approved by the Institutional Animal Care and Use Committees

(IACUC) of Technische Universität München, Regierung von Oberbayern and the UK Home Office.

**Immunofluorescence test for HTVI-based co-delivery of multiple plasmids to hepatocytes.**

To test whether hepatocytes can be transfected simultaneously with multiple plasmids by HTVI, *Rosa26<sup>mTmG</sup>* reporter mice (8) were co-injected with two transposon constructs containing expression cassettes of Flag-YAP and Cre<sup>ERT2</sup> and with *hSB5 transposase* vector (9). Cre<sup>ERT2</sup> activation by Tamoxifen ten days post HTVI leads to conversion of the *Rosa26<sup>mTmG</sup>* allele and subsequent expression of cell-membrane localized GFP. Six month after injection, livers were embedded and sections were immunostained for Flag-YAP (M2-Flag antibody, Sigma-Aldrich; green) and GFP (GFP Tag antibody, Life Technologies; red).

**Magnetic resonance imaging (MRI) screening.** MRI was performed using a 3 Tesla clinical MRI system (Ingenia 3T, Philips Healthcare) with a human 8-channel wrist coil (SENSE Wrist coil 8 elements) following a previously described protocol that was adapted to the 3 Tesla scanner (10). Starting at 20 weeks after HTVI, mice were screened on a regularly basis. To this end, longitudinal T2-weighted (T2w) turbo spin-echo imaging (slice thickness=0.7mm, in-plane resolution=0.3x0.38mm<sup>2</sup>, TR/TE=TR/TE=4352ms/101ms, TF=21, NSA=9, total scan duration 5.22min) was performed for tumor detection and volumetric analysis. Mice were sacrificed once tumors reached a size greater or equal 3mm in diameter.

**Histology and immunohistochemistry.** Histological analysis was performed for all tumors >1mm. Mouse tissues were fixed in 4% formalin solution, embedded in paraffin and cut into 2µm sections. Hematoxylin and eosin (H&E) staining was performed according to standard protocols. Immunohistochemistry was conducted using primary antibodies listed in Table S7. As secondary antibodies we used a rabbit-anti-rat antibody (1:1000, Jackson Immuno Research) and a rabbit-anti-goat antibody (1:300, DAKO) and detection was performed with the Bond Polymer Refine Detection Kit (Leica). Detailed protocols of individual staining procedures are available upon request.

**DNA isolation and microdissection.** DNA was isolated from tissue samples stored in RNAlater (Sigma-Aldrich) with DNeasy Blood & Tissue Kit (Qiagen) according to manufacturer's instructions. For heterogeneity analysis, we microdissected sections of Tu1 under a microscope using 20 gauge needles. DNA was isolated from the microdissected regions in the same manner as from the freshly frozen tissues mentioned above with an extended tissue lysis time of 60h.

**Sequencing of sgRNA target regions.** Genomic sgRNA target regions (5ng DNA per 30 $\mu$ L reaction) were amplified with Q5 $\text{\textcircled{R}}$  High-Fidelity DNA Polymerase (New England Biolabs) using primers displayed in Table S8. For Sanger capillary sequencing, PCR products were purified (QIAquick PCR Purification Kit, Qiagen) and each PCR product was sequenced individually. For amplicon-based next generation sequencing, the ten (eighteen) PCR products of each sample were pooled and purified (QIAquick PCR Purification Kit, Qiagen). Library preparation was carried out as described previously (11). Briefly, after end repair and A-tailing, an Illumina paired end adapter was ligated (NEBNext $\text{\textcircled{R}}$  Ultra DNA Library Prep Kit for Illumina $\text{\textcircled{R}}$ , New England Biolabs; sequences depicted in Table S8) and the individual sample pools were barcoded with eight cycles of PCR (2x KAPA HiFi HotStart ReadyMix, Kapa Biosystems; sequences listed in Table S8). Barcoded samples were pooled and quantified with qPCR (KAPA SYBR $\text{\textcircled{R}}$  Fast qPCR ABI Prism Mix, Kapa Biosystems) and the single pool was sequenced (300bp, paired end) on the Illumina MiSeq Desktop Sequencer (Illumina). To verify the next generation sequencing results, we cloned the PCR products for a subset of target regions into the *pCR $\text{\textcircled{R}}$  2.1-TOPO $\text{\textcircled{R}}$  TA* vector (TOPO $\text{\textcircled{R}}$  TA Cloning $\text{\textcircled{R}}$  Kit, Life Technologies). For each sample, we picked 30 colonies and sequenced them individually using Sanger capillary sequencing.

**Sequencing of sgRNA off-target sites.** Coordinates of potential off-target sites for the ten sgRNAs were downloaded from the CRISPR design tool (<http://crispr.mit.edu>; Table S13) (3). For the top five off-targets (exonic, intronic, intergenic) and (if not already included in the top five list) top three exonic off-targets of each sgRNA flanking PCR primers (Table S14) were designed. PCRs and amplicon-based next generation sequencing were performed in the same manner as described above for the sgRNA target regions.

**Bioinformatic analyses.** MiSeq Illumina paired 300 nucleotide reads were mapped onto *mm10* assembly with *BBMAP short read aligner* (<http://bbmap.sourceforge.net>) using default settings. Among a number of other tested aligners, only this particular aligner was able to map correctly large deletions, such as 178bp in Tu2 (Figure S7). BAM files were sorted and indexed with *samtools (v0.1.19)* (12). After mapping, only paired reads (about 3% were unpaired) were extracted based on *bitwise flag 0x2*. This resulted in BAM files containing only correctly paired reads. In order to obtain data in pileup format with the number of reads covering sites we employed *samtools (v0.1.6) pileup command with option (-i)* which only displays lines containing indels. Pileup files were processed with *VarScan (v2.3.6) pileup2indel command* (13).

**Establishment of cancer cell lines.** To derive cell lines from primary mouse cancers and metastases, tumor tissues were first washed with sterile DPBS (Life Technologies) and cut into small pieces, followed by digestion in RPMI 1640 (Life Technologies) with 10% FBS (Biochrom) and 1x PenStrep (Life Technologies), supplemented with 200 U/mL collagenase (Collagenase Type II, Worthington) at 37°C until tissue pieces were disintegrated completely. Cells were then centrifuged, resuspended in RPMI 1640 containing 10% FBS and 1x PenStrep and sown in six-well plates coated with 0.1% gelatin (Sigma-Aldrich).

**Quantitative Cas9 analysis.** To detect *hSpCas9* presence in the liver samples of mice two weeks post HTVI, 7.5ng genomic DNA was used for real time quantitative PCR (SYBR® Select Master Mix, Life Technologies). *HSpCas9* copy numbers were normalized to mouse *Apolipoprotein B (ApoB)* copy numbers. Primer sequences are listed in Table S9.

**Quantitative guide distribution analysis.** To analyze the distribution of sgRNAs in liver samples of mice two weeks after HTVI, 10ng DNA per 20µL sample was amplified with Taq Polymerase (New England Biolabs) using *CRISPR-SB-fwd* und *CRISPR-SB-rev* primers (Table S10). PCR products were purified (QIAquick PCR Purification Kit, Qiagen) and 10pg purified PCR product was used for guide specific real time quantitative PCR (SYBR® Select Master Mix, Life Technologies). The universal forward primer (*CRISPR-SB-quant-fwd*) and the guide specific reverse primers are displayed in Table S10.

**CRISPR-SB integration analysis.** To test for integration of the *CRISPR-SB* vector into the genome of mouse liver tumors, 10ng genomic DNA per 50 $\mu$ L reaction was amplified (Q5<sup>®</sup> High-Fidelity DNA Polymerase, New England Biolabs) using *CRISPR-SB* specific primers as depicted in Table S12. Liver samples of mice two weeks post HTVI (containing episomal *CRISPR-SB* vectors) functioned as positive controls. 25 $\mu$ L of each PCR was loaded on a 1.5% agarose gel.

**Fusion analysis for detection of large chromosomal deletions.** To test for possible intrachromosomal fusion products caused by combinatorial sgRNA targeting, we performed PCRs spanning the potential location of the fusions as predicted by the sgRNA target sites. To this end, we used 10ng genomic DNA in 30 $\mu$ L PCR reactions (TaKaRa Ex Taq DNA Polymerase, Clontech) using the respective forward and reverse primers of the target sites (Table S8). Resulting PCR products were purified for Sanger capillary sequencing (QIAquick PCR Purification Kit, Qiagen). To quantify the *Cdkn2a* fusion product in regions 1, 2 and 3 of Tu1, we used 10ng DNA of the respective samples for real time quantitative PCR (SYBR<sup>®</sup> Select Master Mix, Life Technologies) with primers displayed in Table S11. Primer *Cdkn2a-ex1 $\beta$ -quant-fwd* with *Cdkn2a-ex2-quant-rev* was used for quantification of the fusion product and *Cdkn2a-ex2-quant-fwd* and *Cdkn2a-ex2-quant-rev* were used for quantification of other alleles at that position (wild type and with small indels).

**Multicolor fluorescence in situ hybridization (M-FISH).** To analyze interchromosomal fusions/rearrangements in liver tumor cell lines derived from mice injected with *hSpcas9* and sgRNAs, M-FISH was carried as described before (14).

**Array comparative genomic hybridization (aCGH).** aCGH was carried out using Agilent 60k mouse CGH arrays with custom design (AMADID 041078) as described previously (15). CGH data was preprocessed with the Agilent Genomic Workbench software. Raw log ratios were recentered by adding or subtracting a constant value to insure that the zero point reflects the most common ploidy state (legacy centralization option). Segmentation and aberration calling were done with the implemented ADM-2 algorithm. Normalized data was imported in R version 3.1.3 (<http://www.r-project.org>). For each detected aberration the closest off-targets surrounding the aberration borders down- and upstream were investigated. The distance and the number of probes between the aberration border and the predicted off-target were calculated. An

aberration was called potentially induced by an off-target if 20 probes or less are located between the aberration and the off target and the distance between them is lower than 500,000 nucleotides.

**Statistics.** To test if CRISPR/Cas9-induced target site mutations across tumors show a random or non-random distribution, we performed a  $\chi^2$  test. To examine if some of the targeted tumor suppressor genes undergo positive selection (in comparison to *Brca1/Brca2* which serve as negative controls) we performed Fisher's Exact tests and corrected p values for multiple testing with the Benjamini Hochberg procedure. Results were considered as significant for p values <0.05.

## References

1. Cong L, *et al.* (2013) Multiplex genome engineering using CRISPR/Cas systems. *Science* 339(6121):819-823.
2. Yant SR, *et al.* (2000) Somatic integration and long-term transgene expression in normal and haemophilic mice using a DNA transposon system. *Nature genetics* 25(1):35-41.
3. Hsu PD, *et al.* (2013) DNA targeting specificity of RNA-guided Cas9 nucleases. *Nature biotechnology* 31(9):827-832.
4. Wang H, *et al.* (2013) One-step generation of mice carrying mutations in multiple genes by CRISPR/Cas-mediated genome engineering. *Cell* 153(4):910-918.
5. Ran FA, *et al.* (2013) Genome engineering using the CRISPR-Cas9 system. *Nature protocols* 8(11):2281-2308.
6. Postic C, *et al.* (1999) Dual roles for glucokinase in glucose homeostasis as determined by liver and pancreatic beta cell-specific gene knock-outs using Cre recombinase. *The Journal of biological chemistry* 274(1):305-315.
7. Hingorani SR, *et al.* (2003) Preinvasive and invasive ductal pancreatic cancer and its early detection in the mouse. *Cancer cell* 4(6):437-450.
8. Muzumdar MD, Tasic B, Miyamichi K, Li L, & Luo L (2007) A global double-fluorescent Cre reporter mouse. *Genesis* 45(9):593-605.
9. Ehmer U, *et al.* (2014) Organ Size Control Is Dominant over Rb Family Inactivation to Restrict Proliferation In Vivo. *Cell reports* 8(2):371-381.
10. Braren R, *et al.* (2011) Validation of preclinical multiparametric imaging for prediction of necrosis in hepatocellular carcinoma after embolization. *Journal of hepatology* 55(5):1034-1040.
11. Quail MA, Swerdlow H, & Turner DJ (2009) Improved protocols for the illumina genome analyzer sequencing system. *Current protocols in human genetics / editorial board, Jonathan L. Haines ... [et al.]* Chapter 18:Unit 18 12.

12. Li H, *et al.* (2009) The Sequence Alignment/Map format and SAMtools. *Bioinformatics* 25(16):2078-2079.
13. Koboldt DC, *et al.* (2009) VarScan: variant detection in massively parallel sequencing of individual and pooled samples. *Bioinformatics* 25(17):2283-2285.
14. Jentsch I, Adler ID, Carter NP, & Speicher MR (2001) Karyotyping mouse chromosomes by multiplex-FISH (M-FISH). *Chromosome research : an international journal on the molecular, supramolecular and evolutionary aspects of chromosome biology* 9(3):211-214.
15. Wolf MJ, *et al.* (2014) Metabolic activation of intrahepatic CD8+ T cells and NKT cells causes nonalcoholic steatohepatitis and liver cancer via cross-talk with hepatocytes. *Cancer cell* 26(4):549-564.



Weber et al., **CRISPR/Cas9 somatic multiplex-mutagenesis for high-throughput functional cancer genomics in mice**

## **Supplementary Figures**

**Supplementary Figure S1. Vectors used for hepatic delivery of multiplexed CRISPR/Cas9 for somatic mutagenesis in mice.** (A) *CRISPR-SB* bicistronic expression vector consisting of a U6 promoter-driven single guide RNA (sgRNA) and a *CBA* (*chicken  $\beta$ -actin*) hybrid intron (CBh) promoter-driven human codon-optimized *Streptococcus pyogenes* Cas9 (*hSpCas9*) flanked by *Sleeping Beauty* (SB) inverted terminal repeats. (B) A cytomegalovirus (CMV) promoter-driven *Sleeping Beauty* transposase (*hSB5*) can mobilize/integrate the *CRISPR-SB* vector into the liver cell genome. NLS, nuclear localization signal; pA, polyadenylation signal.

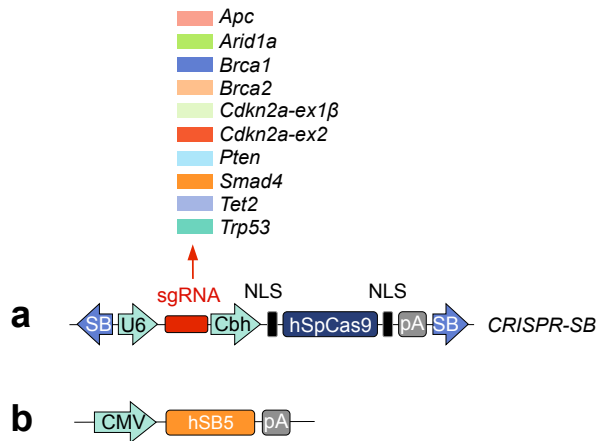

**Supplementary Figure S2. Simultaneous delivery of multiple vectors into hepatocytes upon hydrodynamic tail vein injection (HTVI).** *Rosa26<sup>mTmG</sup>* reporter mice were co-injected with *hSB5* transposase vector and with two transposon constructs containing expression cassettes of *Flag-YAP* and *Cre<sup>ERT2</sup>*. *Cre<sup>ERT2</sup>* activation by Tamoxifen 10 days post HTVI leads to conversion of the *Rosa26<sup>mTmG</sup>* allele and subsequent expression of cell-membrane localized GFP. Six month after injection, livers were embedded and sections were immunostained for *Flag-YAP* (M2-Flag antibody, Sigma-Aldrich; green) and GFP (GFP Tag antibody, Life Technologies; red).

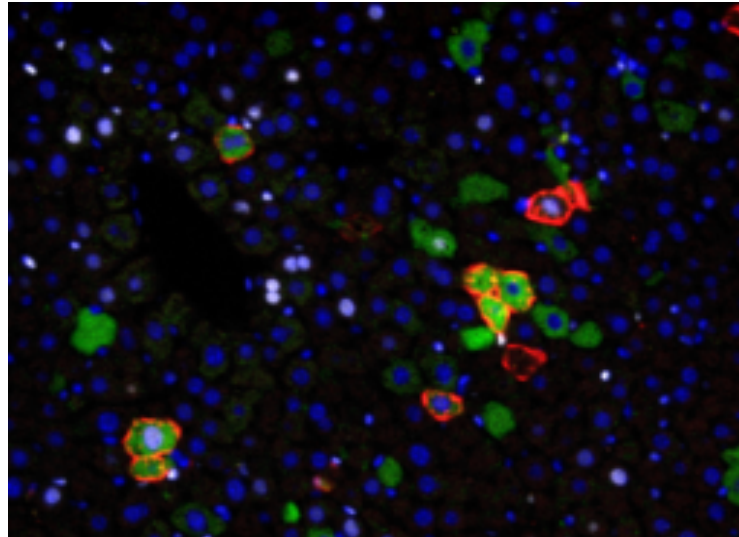

**Supplementary Figure S3. Identification of suitable sgRNAs for somatic mutagenesis.** Prior to *in vivo* application, multiple sgRNAs per gene were tested for their efficiency to induce frameshift-causing mutations in combination with transiently expressed Cas9. Indel frequencies were determined upon T7E1 assays in a mouse pancreatic cancer cell line. Results were used to choose the most efficient sgRNAs for *in vivo* application (in these instances: *Brca1(a)* and *Pten(a)*).

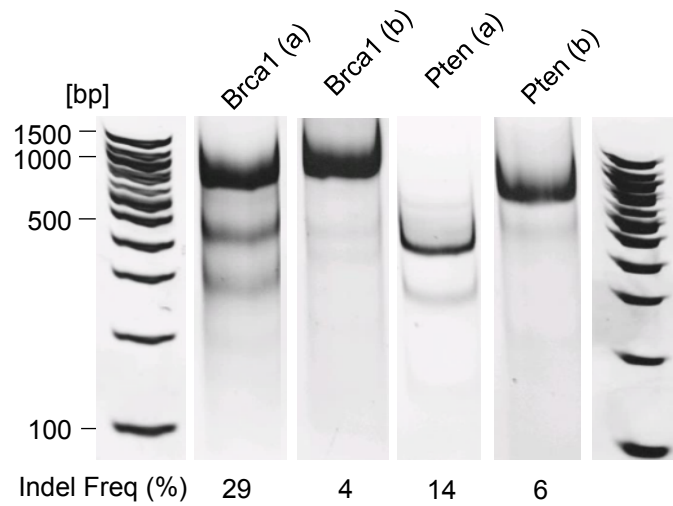

**Supplementary Figure S4. Microscopic images of hepatocellular carcinomas.** Representative microscopic images of hepatocellular carcinomas (HCCs) derived from mice injected with *hSpCas9* and ten sgRNAs.

**Tu7 (upper panels)**, a moderately differentiated HCC with trabecular to solid growth pattern (H&E staining; first image), shows strong *Golgi phosphoprotein 2/Golgi membrane protein GP73* (GOLM1/GP73) expression (second image) and high proliferation activity (Ki67 staining; fourth image).  $\alpha$ -fetoprotein (AFP) is expressed slightly by the majority of tumor cells, scattered neoplastic cells show a strong expression of AFP (third image).

**Tu8 (lower panels)**, a poorly differentiated HCC, shows fatty changes and a slight to moderate fibroplasia (H&E staining; first image). Tumor cells strongly express GP73 (second image) and show a very high proliferative activity (Ki67 staining; fourth image). AFP is expressed with slight to moderate intensity by the majority of neoplastic cells (third image).

Bars, 50 $\mu$ m.

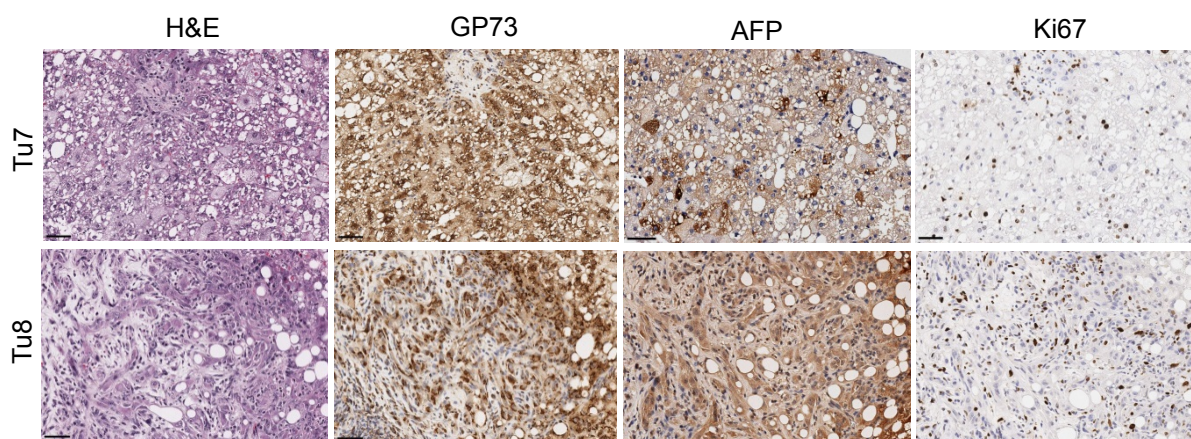

**Supplementary Figure S5. Histology and IHC stainings of three intrahepatic cholangiocarcinomas (ICC).** **Tu1:** Moderately to poorly differentiated ICC with a tubular growth pattern in the tumor periphery (middle panels) and cord-like to solid growth pattern in the central part (lower panels). Tumor cells intensely express cytokeratin 19 (CK19) and A6 (oval cell surface antigen). Collagen-4 (Coll-4) is strongly expressed in tumor-associated stroma. Tumor cells show a high proliferation rate (Ki67 in bottom right image). Bars, 400 $\mu$ m (upper row), 100 $\mu$ m (middle and lower row). **Tu2:** Well to moderately differentiated ICC with strong expression of CK19, A6. Coll-4 is expressed in the tumor-associated stroma. Bars, 100 $\mu$ m. **Tu3:** Well differentiated ICC. Bars, 100 $\mu$ m.

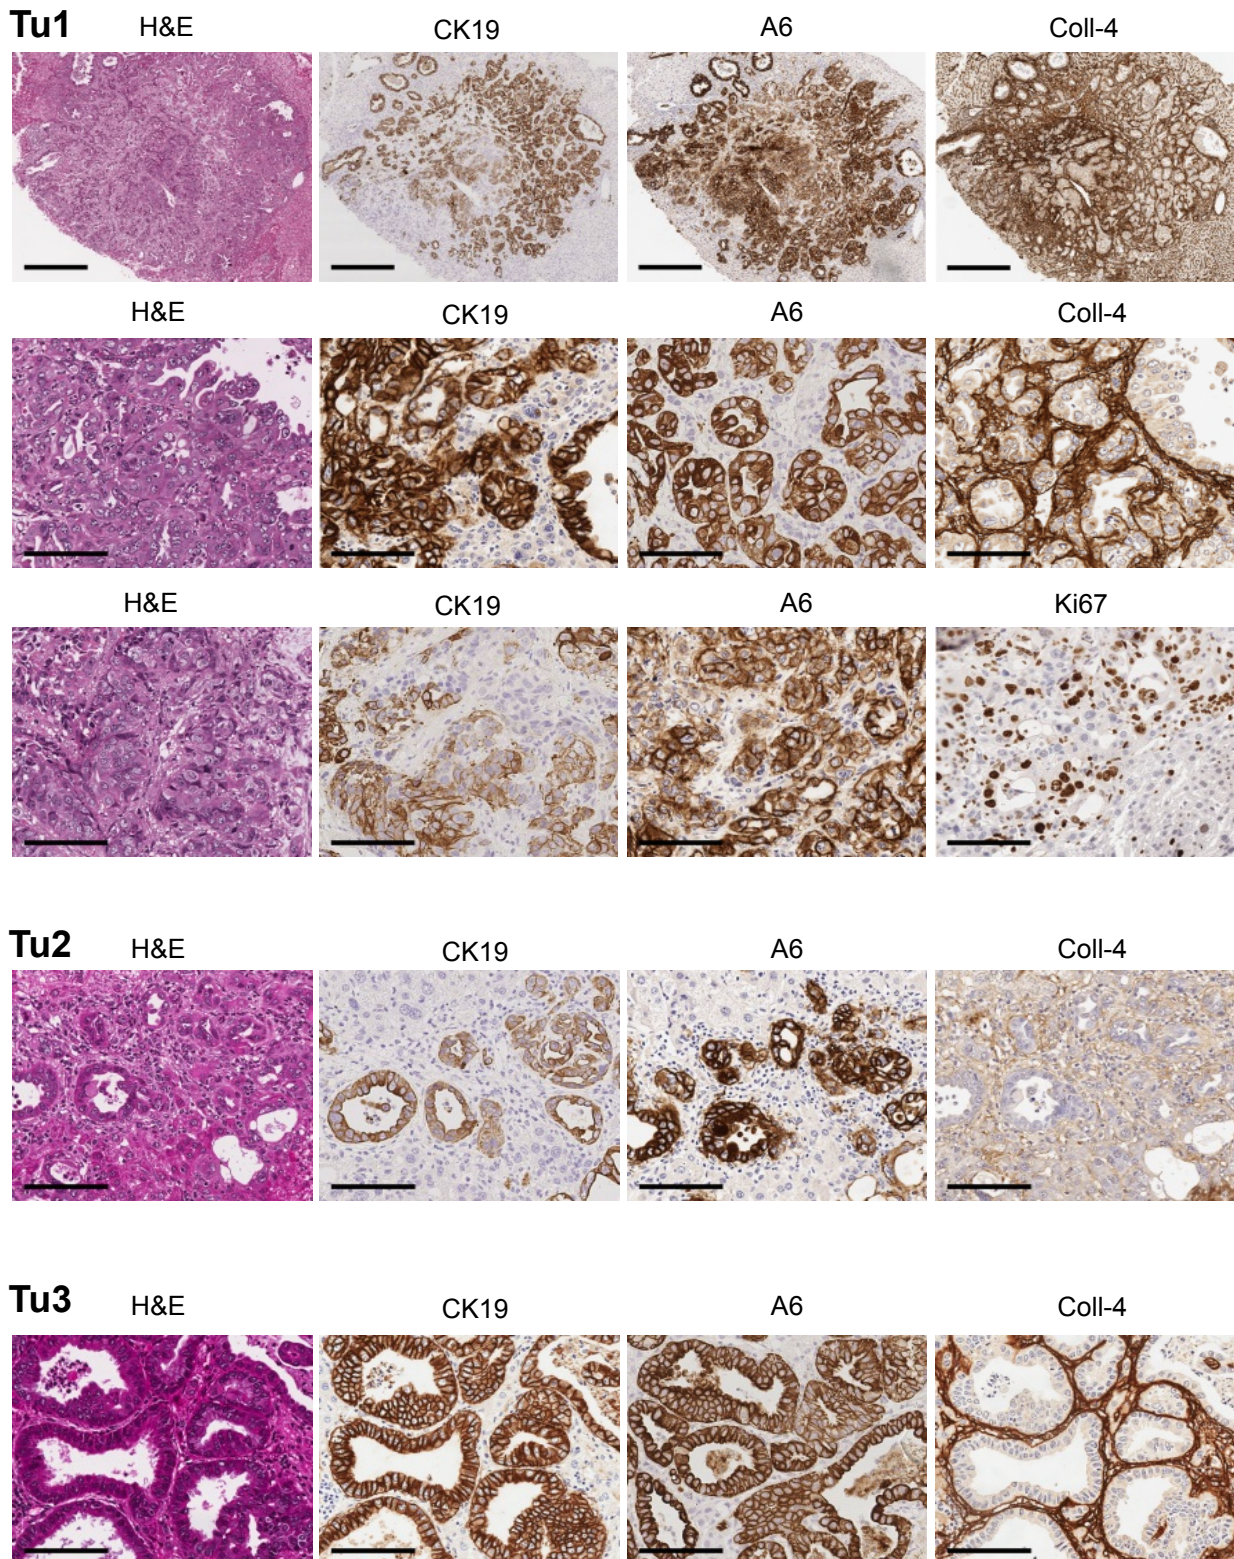

**Supplementary Figure S6. Validation of NGS data by Sanger capillary sequencing of PCR-amplified sgRNA target regions.** Data are shown for *Tet2* and *Pten* in Tu1, Tu2 and Tu3 as well as in healthy liver sample of a tumor-bearing mouse. PCR products of sgRNA target sites have been cloned into *E. coli* and 30 clones per target site and tumor were subjected to Sanger capillary sequencing. (A) Bar charts display percentages of wild type (wt) clones and clones with respective indels. (B) Graphical display shows alignment of the sequence traces with wt sequence using SnapGene® 2.4.3. Sanger sequencing confirmed the results from NGS, which also identified in some cases additional lower-frequency indels (see Figure S8), as expected.

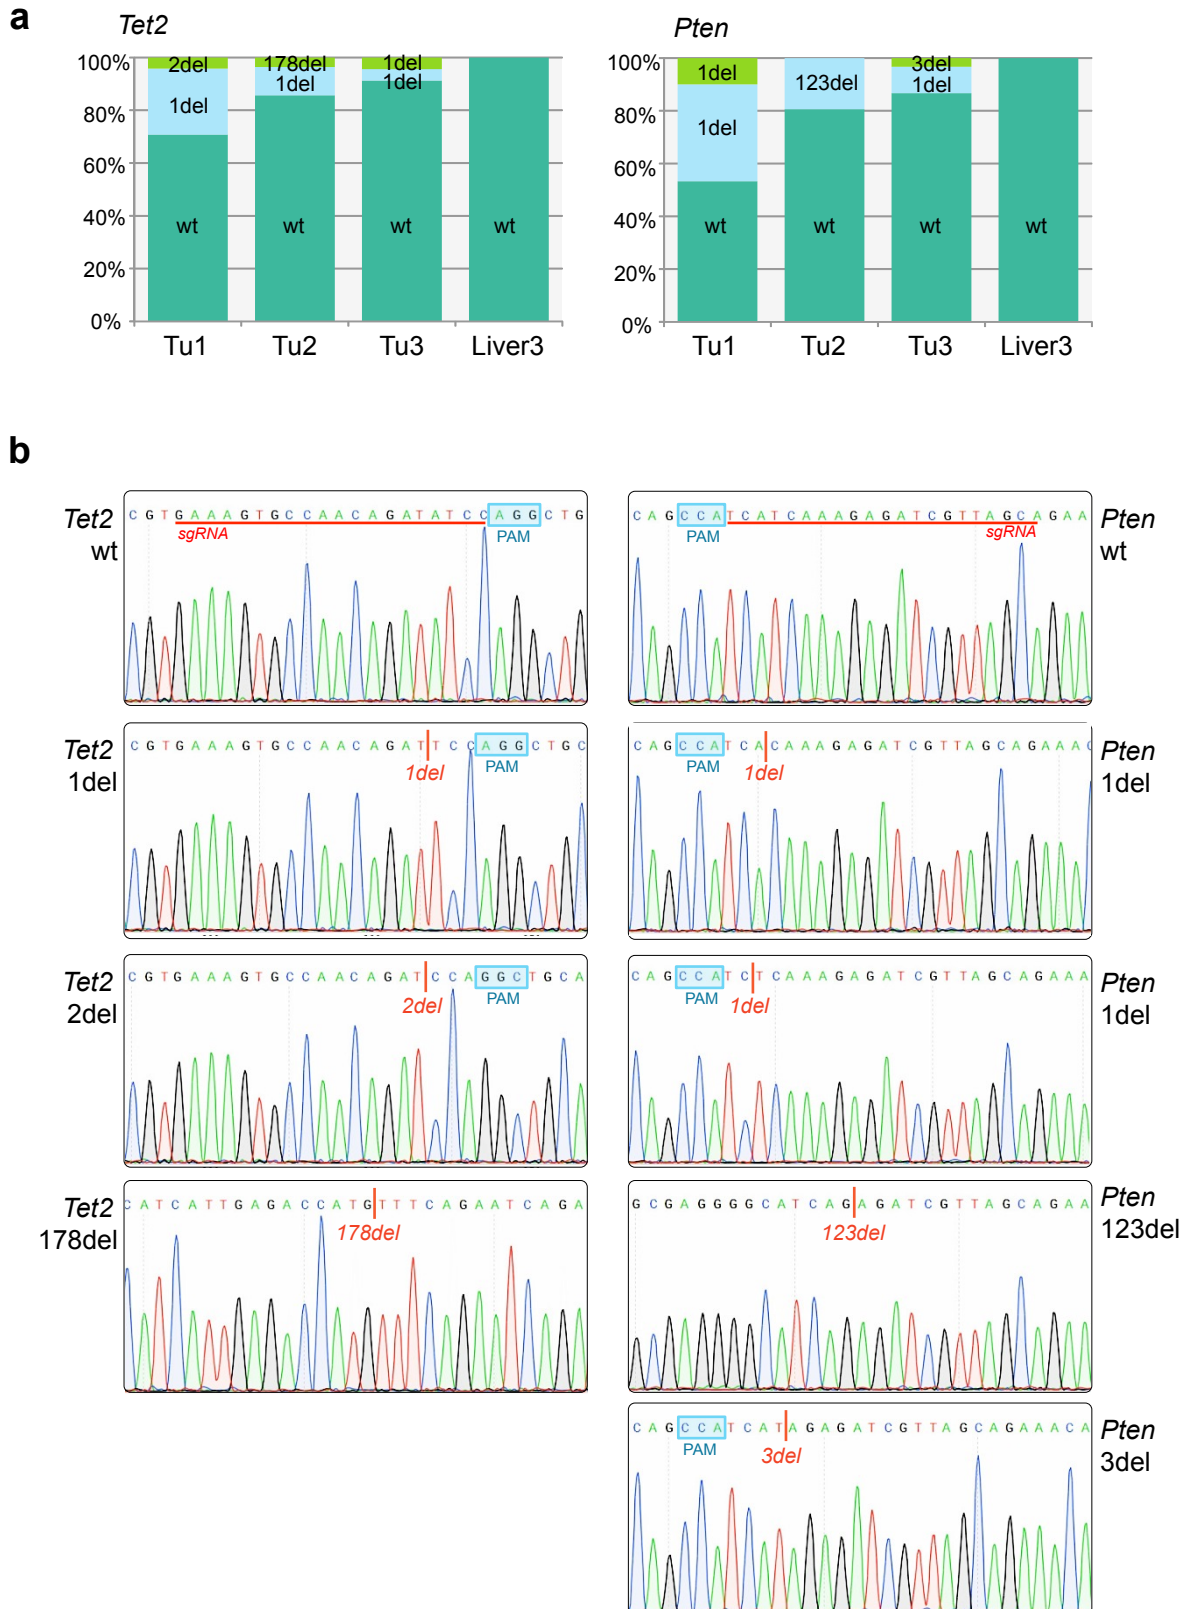

**Supplementary Figure S7. Schematic view of indels induced by multiplexed CRISPR/Cas9 mutagenesis in mice.** The schemes display all mutant target site sequences with frequencies above 1% in Tu1-Tu3 (the data relate to experiments described in figures 1 and 2; cancers induced by ten sgRNA multiplexing). For each mutation the altered sequence is marked in red. Note that mutations in *Brca1* and *Brca2* are either in-frame or have very low MRFs that do not exceed background mutation frequencies in healthy livers, except the 11del mutation in *Brca1* (see also Fig. S8 and Figure 2).

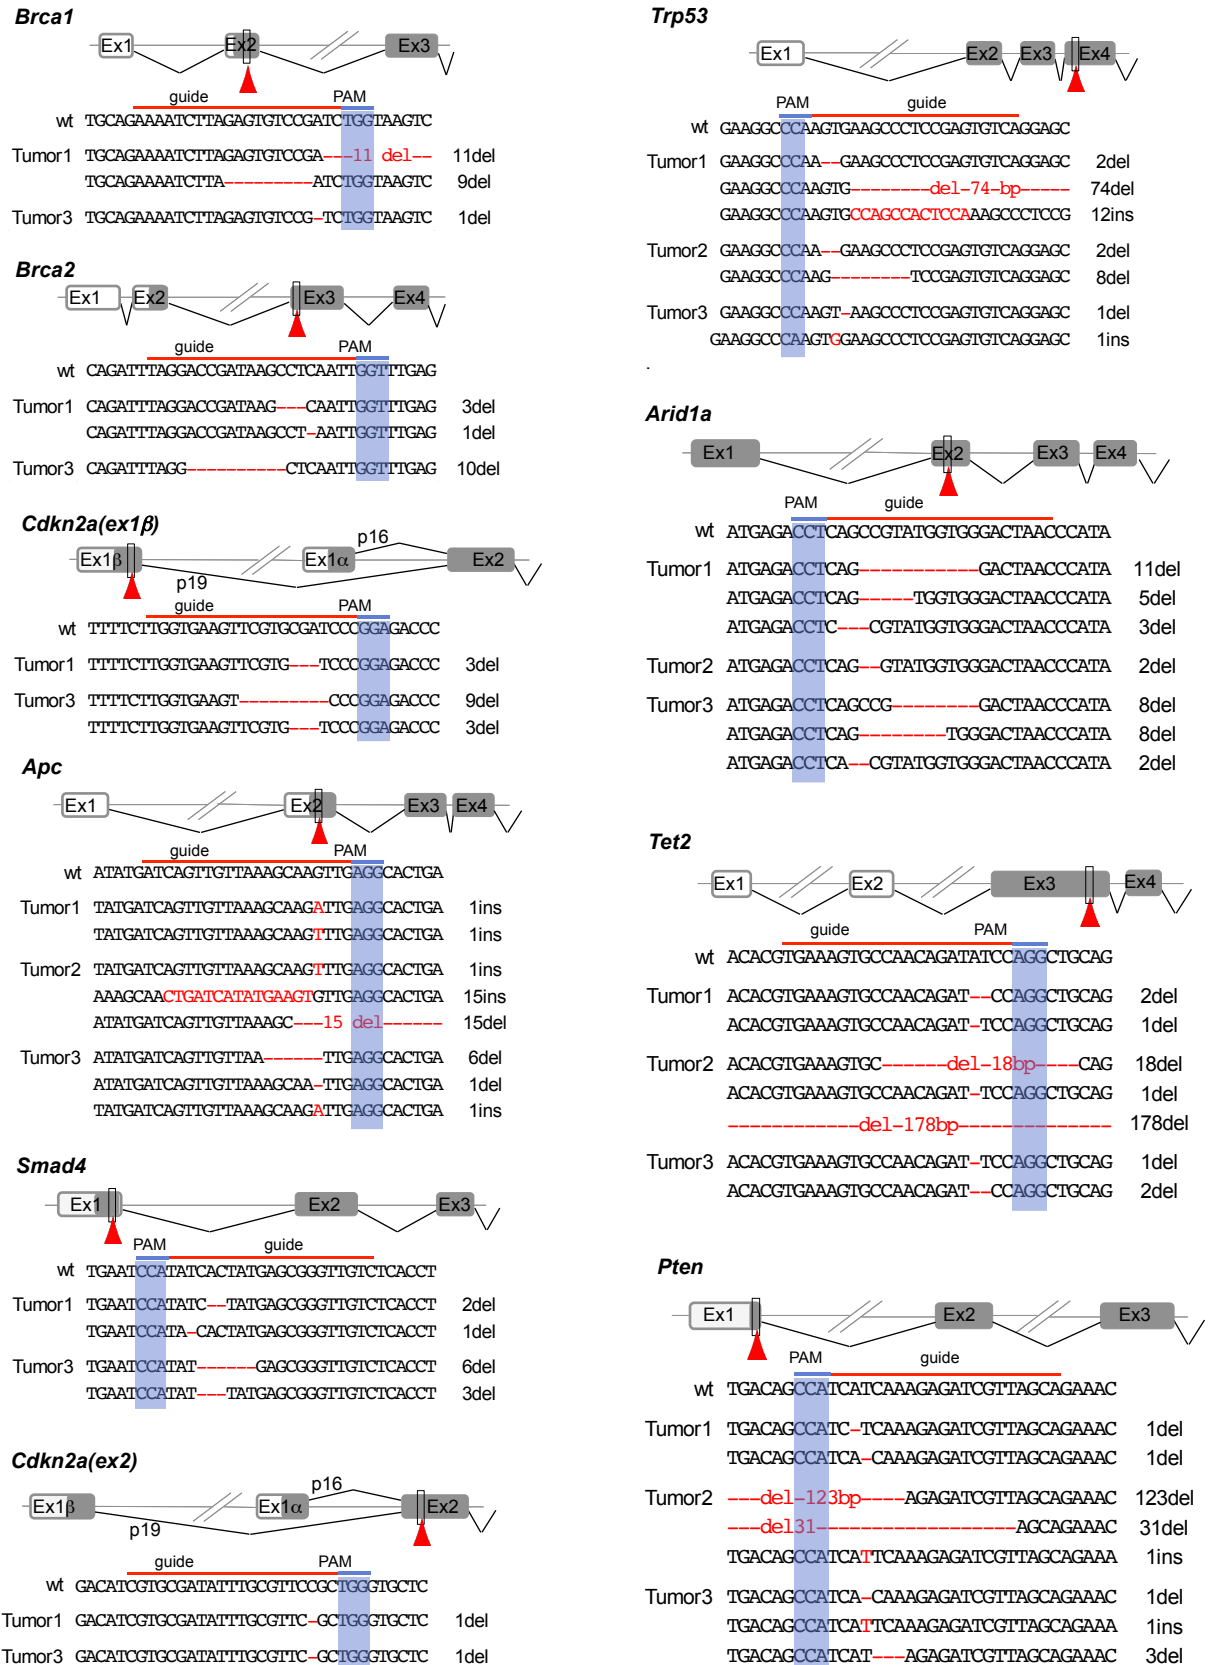



**Supplementary Figure S8. Screening for large deletions at the *Cdkn2a* locus in tumors and healthy liver samples.** Analysis of the *Cdkn2a-ex2* target site using long-range PCR (2900bp) was performed to screen for large deletions that could span a region beyond the standard PCR-amplified and sequenced 400-500 base pairs around target sites. No large deletion at this site could be found in any of the analysed CRISPR/Cas9-induced tumor samples or normal livers.

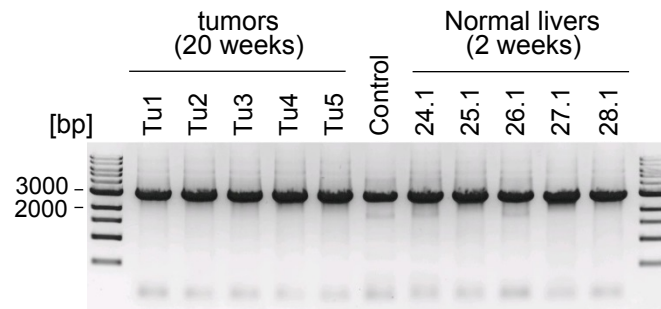



**Supplementary Figure S10. Comparison of sgRNA targeting efficiencies at *Cdkn2a-ex1 $\beta$*  and *Cdkn2a-ex2*.** Efficiencies of the two sgRNAs targeting the *Cdkn2a* locus were assessed using Surveyor assays in murine pancreatic cancer cell lines upon transient transfection of *CRISPR-SB* plasmid as described in the Methods section. The mouse pancreatic cancer cell line *4072-PPT* was chosen because it had - in contrast to most other available mouse cancer cell lines - an intact *Cdkn2a* locus. (+) Cell line transfected with the sgRNA as indicated above; (-) cell line transfected with the non-targeting sgRNA served as a negative control. The results show that mutation of *p19<sup>Arf</sup>* (using *Cdkn2a-ex1 $\beta$*  sgRNA) or induction of the *p19<sup>Arf</sup>/p16<sup>Ink4a</sup>* double-mutant (using *Cdkn2a-ex2* sgRNA) are equally efficient.

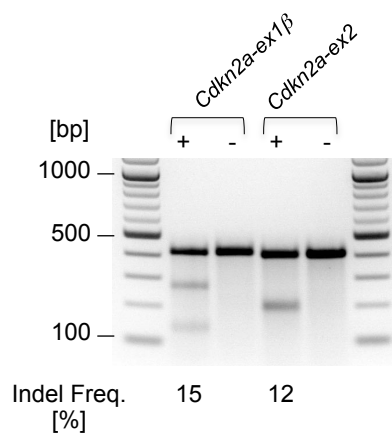

**Supplementary Figure S11. Analysis of intratumor heterogeneity in a CRISPR/Cas9-induced cancer.** (A) Mutant read frequencies (MRF) of frame shift causing indels detected at target sites in region-1 (R1, blue) of Tu1. (B) Regions of Tu1 used for heterogeneity analysis. R1 contains a large proportion of the tumor, R2 and R3 were microdissected. (C) MRF of frame shift causing indels for R2/R3.

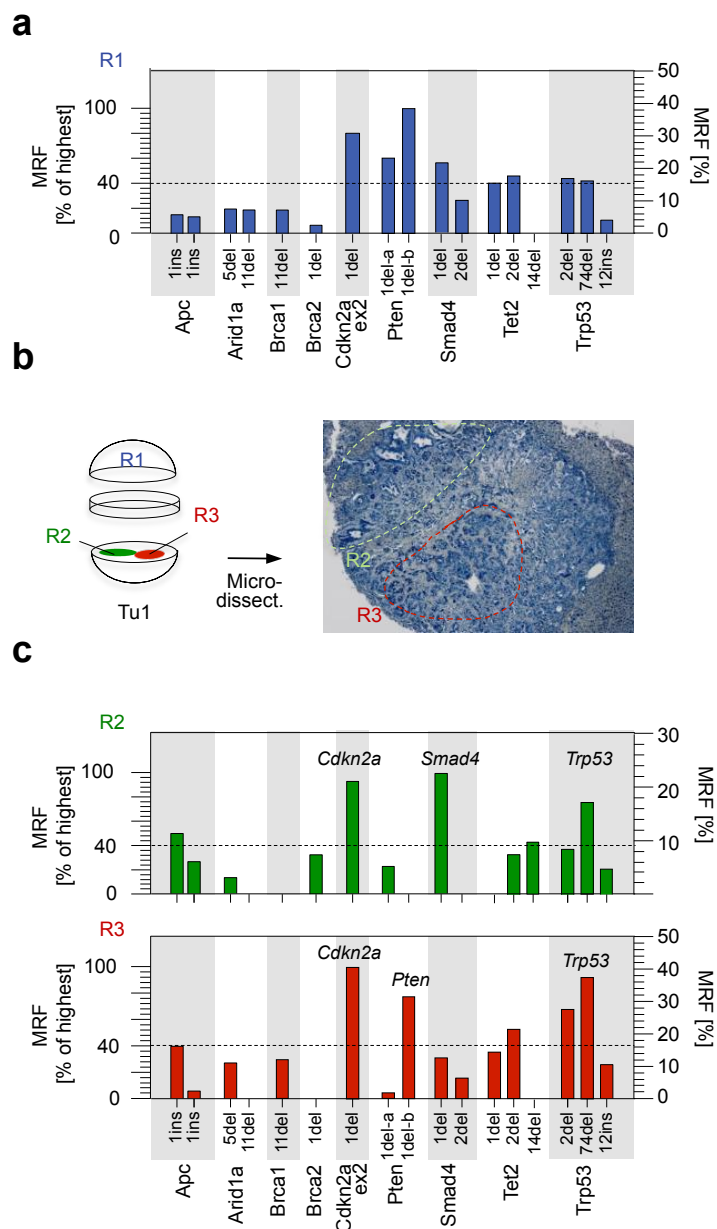

**Supplementary Figure S12. Intrachromosomal fusions induced by combinatorial sgRNA targeting in mice.** (A) Scheme of all chromosomes with two or more CRISPR/Cas9 target sites in the ten sgRNA multiplexing approach. All targeted genes are listed in Figure 1. Out of the 105 possible deletions in 21 tumors we found evidence for fusion products between the *Cdkn2a-ex1 $\beta$*  and *Cdkn2a-ex2* sgRNA target sites in three cancers (see also Figure 2). In all three cases the resulting deletion of approximately 18kb led to inactivation of both *p16<sup>Ink4a</sup>* and *p19<sup>Arf</sup>*. (B) Scheme of *Cdkn2a* dual targeting using 2 sgRNAs. (C) Example of the PCR-amplified fusion product and its sequence trace resulting from deletion of the 17.7kb fragment in Tu1. Red arrows indicate primers. (D) Relative copy numbers of the fusion allele in comparison to other *Cdkn2a-ex2* alleles (including wild type and alleles with small indels) in Tu1, as determined by qPCR. Error bars, SEM from triplicate determinations.

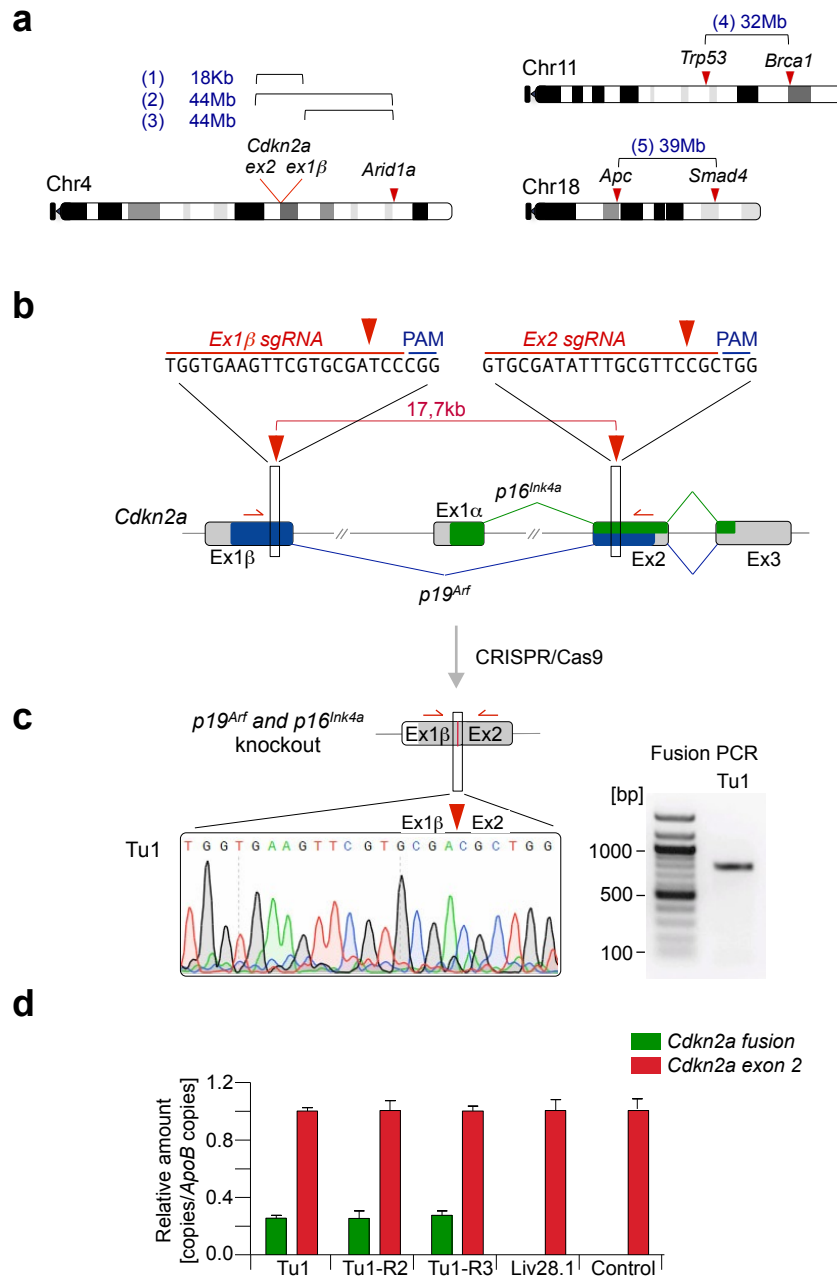

**Supplementary Figure S13. Analysis of off-target effects resulting in intrachromosomal deletions.** Array CGH was performed on six different tumors and analysed for aberrations (see Methods section). Intrachromosomal deletions were screened for 18 on-target and 1550 off-target sites which are distributed throughout all chromosomes.

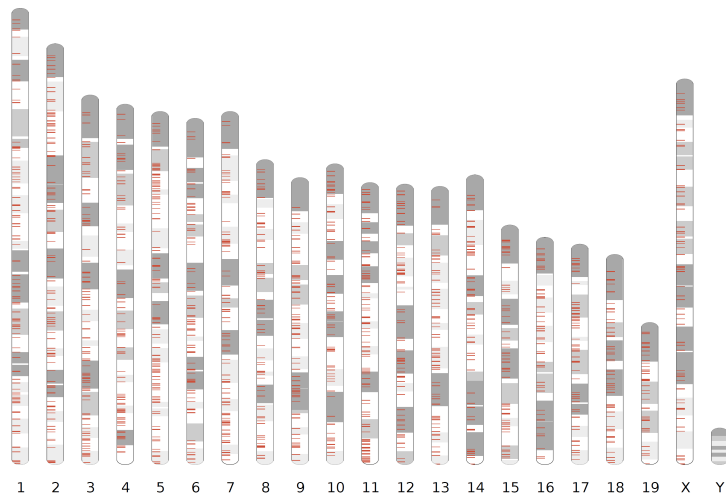

**Supplementary Figure S14. M-FISH analysis of tumor cell lines.** To analyze potential interchromosomal rearrangements in liver tumor cell lines derived from mice injected with *hSpCas9* and sgRNAs, multicolor in situ hybridization (M-FISH) was performed.

M-FISH analysis revealed a tetraploid stable chromosome set for both analyzed cell lines (a, cell line Tu23; b, cell line Tu24). The composite karyotype for cell line Tu23 is 77,XXXX,Del(4),-15,17,-19 (a) and for cell line Tu24 80,XXXX (b). For Tu23, the CRISPR/Cas9 induced large deletion on chromosome 4 is clearly visible in one out of four chromosomes (a, arrow). Further analysis of additional metaphases of cell line Tu23 confirms three different states of chromosome 4 as already identified by PCR: 1. without any visible alterations (wt), 2. with the CRISPR/Cas9 induced 17Mb deletion (small del; *Arid1a-Errfi1* fusion) and 3. with the CRISPR/Cas9 induced 62Mb deletion (large del; *Cdkn2b-Errfi1* fusion) (c).

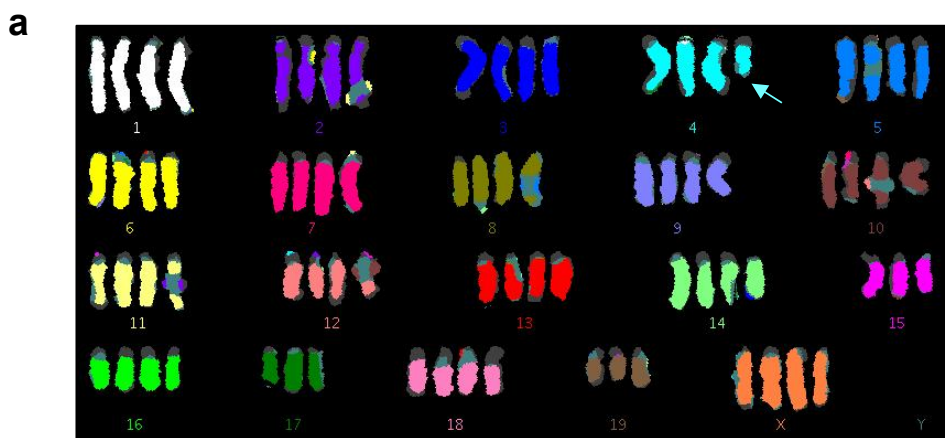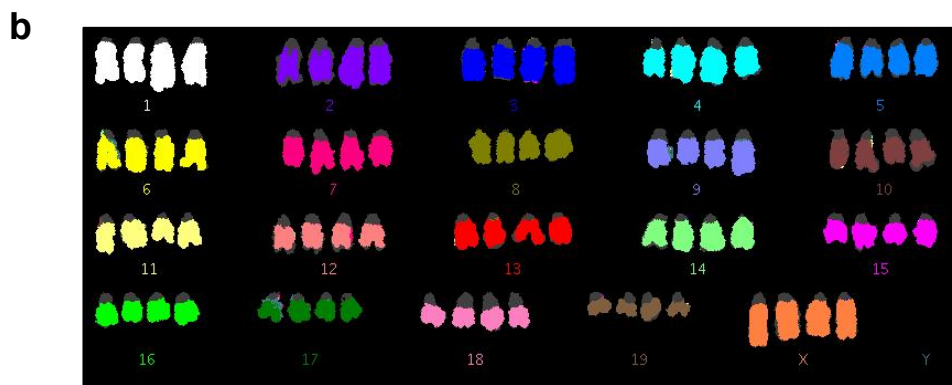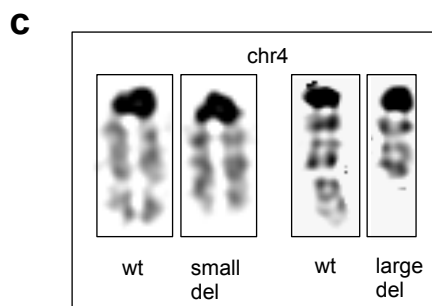

**Supplementary Figure S15. Subcutaneous implantation of tumor cell lines.** Cell lines derived from two primary intrahepatic cholangiocarcinomas (Tu23 and Tu24;  $5 \times 10^5$  cells/implantation) were implanted subcutaneously into the right and left flanks of NOD scid gamma (NOD.Cg-Prkdcscid Il2rgtm1Wjl/SzJ) mice. (A) All mice developed tumors (n=4 per cell line) up to 1cm in diameter within two weeks after implantation. (B) Representative microscopic H&E images of the allograft tumors. The neoplasias show a solid growth pattern with infiltration of the adjacent adipose tissue (left panel) and multifocal necroses (arrows, left panel). The tumor cells are elongated (cell line Tu23, upper left image) or polygonal (cell line 24, lower left image) with a high number of mitoses (arrows, right panel). Bars, 500 $\mu$ m left panels, 50 $\mu$ m right panels.

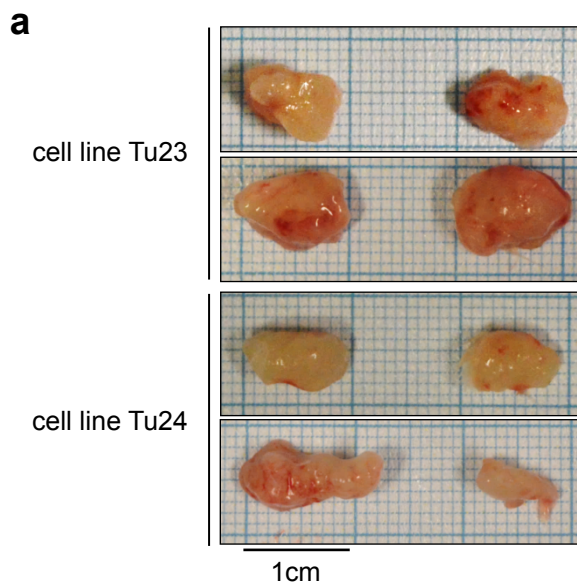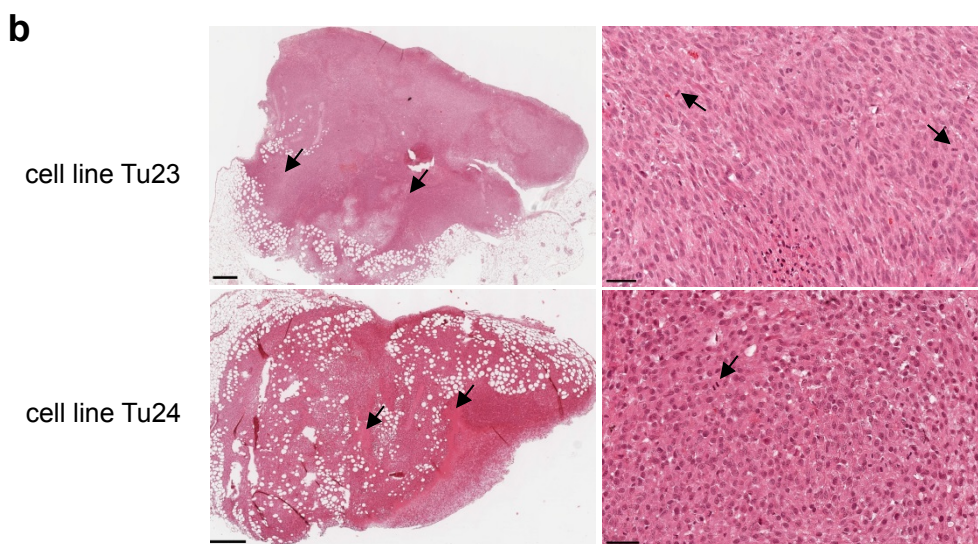



**Supplementary Figure S16. Microscopic images of Tu24 and a corresponding lung metastasis.** Moderately to poorly differentiated intrahepatic cholangiocarcinoma (ICC) with extensive central necrosis (upper panels). Tumor cells intensely express cytokeratin 19 (CK19) and A6 (oval cell surface antigen). Subpleural metastasis of the moderately to poorly differentiated cholangiocarcinoma (lower panels). The metastasis shows a tubular growth pattern with CK19 and A6 positivity, as seen in the primary tumor. Bars, 100 $\mu$ m except upper left: 500 $\mu$ m and lower left: 1mm.

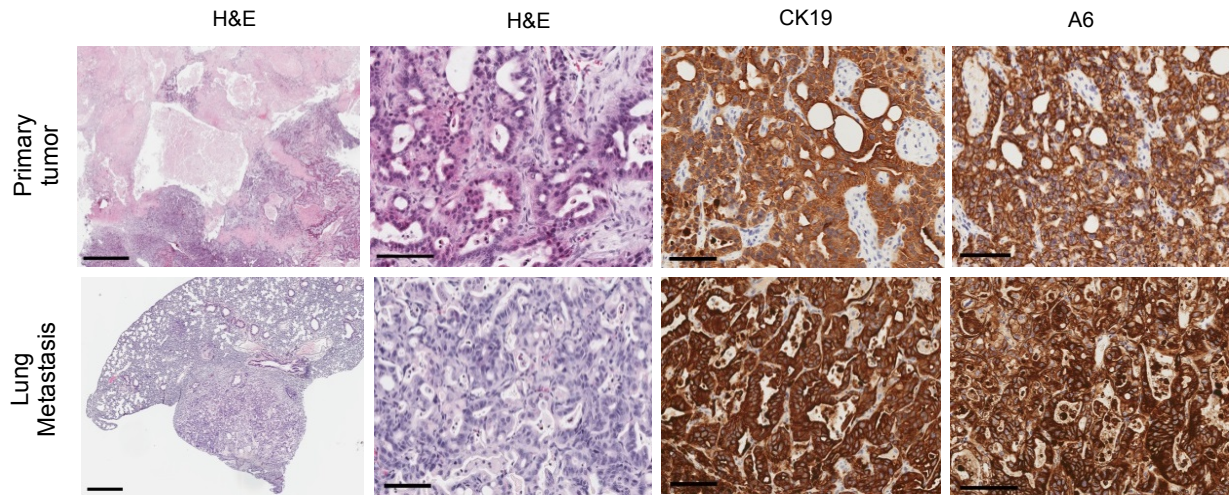

Weber et al., **CRISPR/Cas9 somatic multiplex-mutagenesis for high-throughput functional cancer genomics in mice**

## **Supplementary Tables**

**Supplementary Table 1. Literature-based analysis of tumor suppressor gene alterations in human**

**liver cancers.** A systematic literature-based analysis of tumor suppressor gene alterations in human intrahepatic cholangiocarcinoma (ICC) (A) and hepatocellular carcinoma (HCC) (B) was performed. The tables show alterations found in the ten tumor suppressor genes targeted with CRISPR/Cas9 in the mouse liver using hydrodynamic tail vein injection (HTVI). We used information about mutated genes (MUT) found in recent whole genome/whole exome sequencing studies and about genes being described to be located in commonly deleted regions (DEL) or to be silenced by promoter methylation (PM). In addition, studies analyzing expression of the respective proteins in ICC/HCC (LOSS; loss of expression) were taken into account. For APC, WNT pathway activation (WNT) in ICC was studied.

**A**

| Gene                                        | Type                                                                                                                      | Range [%]   | References   |
|---------------------------------------------|---------------------------------------------------------------------------------------------------------------------------|-------------|--------------|
| <b>APC</b>                                  | PM                                                                                                                        | 26.6 - 47.2 | (1, 2)       |
|                                             | WNT                                                                                                                       |             |              |
|                                             | - reduced membranous expression of $\beta$ -catenin<br>- aberrant nuclear expression of $\beta$ -catenin                  | 82<br>15    | (3)<br>(3)   |
| <b>ARID1A</b>                               | MUT                                                                                                                       | 9 - 35.5    | (4-7)        |
| <b>BRCA1</b>                                | MUT                                                                                                                       | 0 - 3.6*    | (4-7)        |
| <b>BRCA2</b>                                |                                                                                                                           |             |              |
| <b>CDKN2A</b>                               | MUT                                                                                                                       | 0 - 5.6     | (4-7)        |
|                                             | PM                                                                                                                        | 15.7 - 83.0 | (1, 2, 8, 9) |
|                                             | LOSS                                                                                                                      | 35.7        | (10)         |
|                                             | DEL                                                                                                                       | 18.0        | (11)         |
| <b>PTEN</b>                                 | MUT                                                                                                                       | 0 - 10.7    | (4-7)        |
|                                             | PM                                                                                                                        | 35.3        | (8)          |
| <b>SMAD4</b>                                | MUT                                                                                                                       | 0 - 16.7    | (4-7)        |
|                                             | LOSS                                                                                                                      | 45.2        | (10)         |
| <b>TET2</b>                                 |                                                                                                                           |             |              |
| <b>TP53</b>                                 | MUT                                                                                                                       | 6 - 44.4    | (4-7)        |
|                                             | PM                                                                                                                        | 61.1        | (12)         |
| * Only 1 <i>Brca1</i> mutation in 1 patient |                                                                                                                           |             |              |
| <b>Legend</b>                               |                                                                                                                           |             |              |
| LOSS                                        | loss of expression                                                                                                        |             |              |
| DEL                                         | large deletions                                                                                                           |             |              |
| MUT                                         | mutations found in exome sequencing studies                                                                               |             |              |
| PM                                          | promoter methylation                                                                                                      |             |              |
| WNT                                         | Wnt pathway activation                                                                                                    |             |              |
| <b>References</b>                           |                                                                                                                           |             |              |
| 1.                                          | B. Yang, M. G. House, M. Guo, J. G. Herman, D. P. Clark, <i>Modern pathology</i> <b>18</b> , 412 (2005).                  |             |              |
| 2.                                          | S. Lee, W. H. Kim, H. Y. Jung, M. H. Yang, G. H. Kang, <i>The American journal of pathology</i> <b>161</b> , 1015 (2002). |             |              |
| 3.                                          | K. Sugimachi et al., <i>Modern pathology</i> , <b>900</b> (2001).                                                         |             |              |
| 4.                                          | B. Goepfert et al., <i>Hepatology</i> <b>59</b> , <b>544</b> (2014).                                                      |             |              |
| 5.                                          | Y. Jiao et al., <i>Nature genetics</i> <b>45</b> , <b>1470</b> (2013).                                                    |             |              |
| 6.                                          | W. Chan-On et al., <i>Nature genetics</i> <b>45</b> , 1474 (2013).                                                        |             |              |
| 7.                                          | C. K. Ong et al., <i>Nature genetics</i> <b>44</b> , 690 (2012).                                                          |             |              |
| 8.                                          | J. S. Ross et al., <i>The oncologist</i> <b>19</b> , 235 (2014).                                                          |             |              |
| 9.                                          | R. Sriraksa et al., <i>British journal of cancer</i> <b>104</b> , 1313 (2011).                                            |             |              |
| 10.                                         | A. Tannapfel et al., <i>Gut</i> <b>47</b> , <b>721</b> (2000).                                                            |             |              |
| 11.                                         | Y. K. Kang, W. H. Kim, J. J. Jang, <i>Human pathology</i> <b>33</b> , 877 (2002).                                         |             |              |
| 12.                                         | D. Sia et al., <i>Gastroenterology</i> <b>144</b> , 829 (2013).                                                           |             |              |
| 13.                                         | L. Xiaofang, T. Kun, Y. Shaoping, W. Zaiqiu, S. Hailong, <i>World journal of surgical oncology</i> <b>10</b> , 5 (2012).  |             |              |

**B**

| Gene                                                                                                                                                                                                                                                                                                                                                                                                                                                                                                                                                                                                                                                                                                                                                                                                                                                                                                                                                                                                                                                                                                                                                                                                                                                                                      | Type | Range [%]   | References  |
|-------------------------------------------------------------------------------------------------------------------------------------------------------------------------------------------------------------------------------------------------------------------------------------------------------------------------------------------------------------------------------------------------------------------------------------------------------------------------------------------------------------------------------------------------------------------------------------------------------------------------------------------------------------------------------------------------------------------------------------------------------------------------------------------------------------------------------------------------------------------------------------------------------------------------------------------------------------------------------------------------------------------------------------------------------------------------------------------------------------------------------------------------------------------------------------------------------------------------------------------------------------------------------------------|------|-------------|-------------|
| <b>APC</b>                                                                                                                                                                                                                                                                                                                                                                                                                                                                                                                                                                                                                                                                                                                                                                                                                                                                                                                                                                                                                                                                                                                                                                                                                                                                                | MUT  | 0 – 3.0     | (13-20)     |
|                                                                                                                                                                                                                                                                                                                                                                                                                                                                                                                                                                                                                                                                                                                                                                                                                                                                                                                                                                                                                                                                                                                                                                                                                                                                                           | DEL  | 0 – 0.5     | (13-15, 18) |
|                                                                                                                                                                                                                                                                                                                                                                                                                                                                                                                                                                                                                                                                                                                                                                                                                                                                                                                                                                                                                                                                                                                                                                                                                                                                                           | LOSS | 53.0        | (21)        |
| <b>ARID1A</b>                                                                                                                                                                                                                                                                                                                                                                                                                                                                                                                                                                                                                                                                                                                                                                                                                                                                                                                                                                                                                                                                                                                                                                                                                                                                             | MUT  | 2.0 – 16.0  | (13-20)     |
|                                                                                                                                                                                                                                                                                                                                                                                                                                                                                                                                                                                                                                                                                                                                                                                                                                                                                                                                                                                                                                                                                                                                                                                                                                                                                           | DEL  | 0 – 1.4     | (13-15, 18) |
| <b>BRCA1</b>                                                                                                                                                                                                                                                                                                                                                                                                                                                                                                                                                                                                                                                                                                                                                                                                                                                                                                                                                                                                                                                                                                                                                                                                                                                                              | MUT  | 0 – 2.0     | (13-20)     |
|                                                                                                                                                                                                                                                                                                                                                                                                                                                                                                                                                                                                                                                                                                                                                                                                                                                                                                                                                                                                                                                                                                                                                                                                                                                                                           | DEL  | 0 – 0.3     | (13-15, 18) |
| <b>BRCA2</b>                                                                                                                                                                                                                                                                                                                                                                                                                                                                                                                                                                                                                                                                                                                                                                                                                                                                                                                                                                                                                                                                                                                                                                                                                                                                              | MUT  | 0 - 5.7     | (13-20)     |
|                                                                                                                                                                                                                                                                                                                                                                                                                                                                                                                                                                                                                                                                                                                                                                                                                                                                                                                                                                                                                                                                                                                                                                                                                                                                                           | DEL  | 0 – 0.8     | (13-15, 18) |
| <b>CDKN2A</b>                                                                                                                                                                                                                                                                                                                                                                                                                                                                                                                                                                                                                                                                                                                                                                                                                                                                                                                                                                                                                                                                                                                                                                                                                                                                             | MUT  | 0 - 2.9     | (13-20)     |
|                                                                                                                                                                                                                                                                                                                                                                                                                                                                                                                                                                                                                                                                                                                                                                                                                                                                                                                                                                                                                                                                                                                                                                                                                                                                                           | DEL  | 4.0 - 6.4   | (13-15, 18) |
|                                                                                                                                                                                                                                                                                                                                                                                                                                                                                                                                                                                                                                                                                                                                                                                                                                                                                                                                                                                                                                                                                                                                                                                                                                                                                           | PM   | 17.6        | (22)        |
|                                                                                                                                                                                                                                                                                                                                                                                                                                                                                                                                                                                                                                                                                                                                                                                                                                                                                                                                                                                                                                                                                                                                                                                                                                                                                           | LOSS | 72.2        | (22)        |
| <b>PTEN</b>                                                                                                                                                                                                                                                                                                                                                                                                                                                                                                                                                                                                                                                                                                                                                                                                                                                                                                                                                                                                                                                                                                                                                                                                                                                                               | MUT  | 0 – 4.0     | (13-20)     |
|                                                                                                                                                                                                                                                                                                                                                                                                                                                                                                                                                                                                                                                                                                                                                                                                                                                                                                                                                                                                                                                                                                                                                                                                                                                                                           | DEL  | 4.0         | (13-15, 18) |
|                                                                                                                                                                                                                                                                                                                                                                                                                                                                                                                                                                                                                                                                                                                                                                                                                                                                                                                                                                                                                                                                                                                                                                                                                                                                                           | PM   | 16.1        | (23)        |
|                                                                                                                                                                                                                                                                                                                                                                                                                                                                                                                                                                                                                                                                                                                                                                                                                                                                                                                                                                                                                                                                                                                                                                                                                                                                                           | LOSS | 40.9 – 57.1 | (24, 25)    |
| <b>SMAD4</b>                                                                                                                                                                                                                                                                                                                                                                                                                                                                                                                                                                                                                                                                                                                                                                                                                                                                                                                                                                                                                                                                                                                                                                                                                                                                              | MUT  | 0 - 0.9     | (13-20)     |
|                                                                                                                                                                                                                                                                                                                                                                                                                                                                                                                                                                                                                                                                                                                                                                                                                                                                                                                                                                                                                                                                                                                                                                                                                                                                                           | DEL  | 0 - 0.8     | (13-15, 18) |
| <b>TET2</b>                                                                                                                                                                                                                                                                                                                                                                                                                                                                                                                                                                                                                                                                                                                                                                                                                                                                                                                                                                                                                                                                                                                                                                                                                                                                               | MUT  | 0 – 2.0     | (13-20)     |
|                                                                                                                                                                                                                                                                                                                                                                                                                                                                                                                                                                                                                                                                                                                                                                                                                                                                                                                                                                                                                                                                                                                                                                                                                                                                                           | DEL  | 0 - 0.8     | (13-15, 18) |
| <b>TP53</b>                                                                                                                                                                                                                                                                                                                                                                                                                                                                                                                                                                                                                                                                                                                                                                                                                                                                                                                                                                                                                                                                                                                                                                                                                                                                               | MUT  | 18 - 51.8   | (13-20)     |
|                                                                                                                                                                                                                                                                                                                                                                                                                                                                                                                                                                                                                                                                                                                                                                                                                                                                                                                                                                                                                                                                                                                                                                                                                                                                                           | DEL  | 0 - 3.0     | (13-15, 18) |
| <p><b>Legend</b></p> <p>LOSS    loss of expression<br/> DEL      large deletions<br/> MUT     mutations found in exome sequencing studies<br/> PM       promoter methylation</p> <p><b>References</b></p> <p>14. E. Cerami et al., <i>Cancer discovery</i> 2, 401 (2012).<br/> 15. J. Gao et al., <i>Science signaling</i> 6, pl1 (2013).<br/> 16. C. Guichard et al., <i>Nature genetics</i> 44, 694 (2012).<br/> 17. A. Fujimoto et al., <i>Nature genetics</i> 44, 760 (2012).<br/> 18. J. Huang et al., <i>Nature genetics</i> 44, 1117 (2012).<br/> 19. K. Schulze et al., <i>Nature genetics</i> 47, 505 (2015).<br/> 20. S. P. Cleary et al., <i>Hepatology</i> 58, 1693 (2013).<br/> 21. Z. Kan et al., <i>Genome research</i> 23, 1422 (2013).<br/> 22. B. Yang, M. Guo, J. G. Herman, D. P. Clark, <i>The American journal of pathology</i> 163, 1101 (2003).<br/> 23. K. Fukai et al., <i>Liver international : official journal of the International Association for the Study of the Liver</i> 25, 1209 (2005).<br/> 24. L. Wang et al., <i>Hepatology research : the official journal of the Japan Society of Hepatology</i> 37, 389 (2007).<br/> 25. Y. Totoki et al., <i>Nature genetics</i> 43, 464 (2011).<br/> 26. T. H. Hu et al., <i>Cancer</i> 97, 1929 (2003).</p> |      |             |             |

**Supplementary Table 2. Indel analysis in healthy livers and liver tumors derived from mice injected with *hSpCas9* and ten sgRNAs.** CRISPR-SB vectors expressing *hSpCas9* and ten sgRNAs (targeting ten different tumor suppressor genes) were delivered into livers of *Alb-Cre;Kras<sup>LSL-G12D/+</sup>* mice using hydrodynamic tail vein injection (HTVI). 20 to 30 weeks post HTVI, mice developed liver tumors (ICCs and HCCs). DNA was isolated from healthy livers of tumor-bearing mice (n=5; Liver1-Liver5) and liver tumors (n=21; Tu1-Tu21) (see Figure 2). CRISPR/Cas9 target regions were amplified and sequenced using amplicon-based next-generation sequencing (see Methods section). The table below shows all indels derived from healthy livers of tumor-bearing mice and liver tumors detected with a mutant read frequency (MRF) of 0.2% or higher. This cut-off was set to account for technical sequencing errors.

| Liver 1     |       |       |               |            |
|-------------|-------|-------|---------------|------------|
| Gene        | MRF   | Mut   | Position      | Indel      |
| Brca1       | 0.23% | 68del | 11: 101549019 | -CGG...ATA |
| Apc         | 0.20% | 27del | 18: 34261044  | -AGT...TGA |
| Apc         | 0.21% | 1del  | 18: 34261059  | -T         |
| Apc         | 0.25% | 1ins  | 18: 34261059  | +A         |
| Apc         | 0.55% | 1ins  | 18: 34261059  | +T         |
| Trp53       | 0.22% | 11del | 11: 69587432  | -GCC...GAA |
| Trp53       | 0.22% | 3del  | 11: 69587440  | -GAA       |
| Arid1a      | 0.36% | 1del  | 4: 133723009  | -C         |
| Tet2        | 0.37% | 11del | 3: 133485654  | -TGG...TGT |
| Tet2        | 0.20% | 2del  | 3: 133485657  | -AT        |
| Tet2        | 0.73% | 1del  | 3: 133485658  | -T         |
| Pten        | 0.50% | 14del | 19: 32758455  | -CAT...TCG |
| Pten        | 1.30% | 1del  | 19: 32758456  | -A         |
| Pten        | 0.27% | 1del  | 19: 32758457  | -T         |
| Liver 2     |       |       |               |            |
| Gene        | MRF   | Mut   | Position      | Indel      |
| Cdkn2a(Ex2) | 0.21% | 7del  | 4: 89276737   | -GCGGAAC   |
| Pten        | 0.67% | 23del | 19: 32758440  | -AGA...AAG |
| Pten        | 0.83% | 1ins  | 19: 32758457  | +T         |
| Liver 3     |       |       |               |            |
| Gene        | MRF   | Mut   | Position      | Indel      |
| Pten        | 0.48% | 11del | 19: 32758457  | -TCA...ATC |
| Pten        | 0.31% | 2del  | 19: 32758458  | -CA        |
| Liver 4     |       |       |               |            |
| Gene        | MRF   | Mut   | Position      | Indel      |
| Smad4       | 0,95% | 3del  | 18: 73675798  | -GTG       |
| Apc         | 0,29% | 6del  | 18: 34261053  | -AGCAAG    |
| Apc         | 0,27% | 1ins  | 18: 34261058  | +G         |
| Apc         | 0,37% | 1ins  | 18: 34261059  | +T         |
| Trp53       | 0,68% | 1del  | 11: 69587439  | -T         |
| Trp53       | 0,52% | 28del | 11: 69587440  | -GAA...CTG |
| Trp53       | 0,66% | 1del  | 11: 69587440  | -G         |
| Trp53       | 0,66% | 11del | 11: 69587440  | -GAA...CCG |
| Arid1a      | 0,54% | 3del  | 4: 133723006  | -CGG       |
| Tet2        | 0,94% | 8del  | 3: 133485653  | -CTGGATAT  |
| Tet2        | 0,40% | 2del  | 3: 133485657  | -AT        |
| Tet2        | 1,17% | 14del | 3: 133485658  | -TAT...ACT |
| Pten        | 0,85% | 1ins  | 19: 32758457  | +T         |
| Liver 5     |       |       |               |            |
| Gene        | MRF   | Mut   | Position      | Indel      |
| -           | 0.0%  | -     | -             | -          |

| Tu1                  |        |       |               |            |
|----------------------|--------|-------|---------------|------------|
| Gene                 | MRF    | Mut   | Position      | Indel      |
| Brca1                | 7.29%  | 11del | 11: 101549007 | -GAC...AGA |
| Brca1                | 7.28%  | 9del  | 11: 101549019 | -CGGACACTC |
| Brca2                | 5.31%  | 3del  | 5: 150529485  | -CCT       |
| Brca2                | 2.52%  | 1del  | 5: 150529488  | -C         |
| Cdkn2a(Ex1 $\beta$ ) | 0.51%  | 3del  | 4: 89294435   | -ATC       |
| Cdkn2a(Ex1 $\beta$ ) | 0.58%  | 15del | 4: 89294436   | -TCG...CAC |
| Cdkn2a(Ex1 $\beta$ ) | 9.88%  | 3del  | 4: 89294436   | -TCG       |
| Apc                  | 5.13%  | 1ins  | 18: 34261059  | +T         |
| Apc                  | 5.84%  | 1ins  | 18: 34261059  | +A         |
| Smad4                | 10.17% | 2del  | 18: 73675798  | -GT        |
| Smad4                | 20.36% | 1del  | 18: 73675801  | -A         |
| Cdkn2a(Ex2)          | 30.53% | 1del  | 4: 89276739   | -G         |
| Trp53                | 0.46%  | 2del  | 11: 69587437  | -AG        |
| Trp53                | 16.38% | 2del  | 11: 69587438  | -GT        |
| Trp53                | 0.37%  | 2del  | 11: 69587439  | -TG        |
| Trp53                | 0.20%  | 2del  | 11: 69587440  | -GA        |
| Trp53                | 0.34%  | 1del  | 11: 69587440  | -G         |
| Trp53                | 0.21%  | 2ins  | 11: 69587441  | +CC        |
| Trp53                | 0.34%  | 1ins  | 11: 69587441  | +C         |
| Trp53                | 4.09%  | 12ins | 11: 69587441  | +CCA...CCA |
| Trp53                | 15.75% | 74del | 11: 69587441  | -AAG...GCC |
| Trp53                | 0.26%  | 1ins  | 11: 69587446  | +A         |
| Arid1a               | 7.16%  | 11del | 4: 133722998  | -CCA...CGG |
| Arid1a               | 7.48%  | 5del  | 4: 133723004  | -TACGG     |
| Arid1a               | 8.35%  | 3del  | 4: 133723008  | -GCT       |
| Tet2                 | 17.69% | 2del  | 3: 133485657  | -AT        |
| Tet2                 | 15.47% | 1del  | 3: 133485658  | -T         |
| Pten                 | 23.13% | 1del  | 19: 32758456  | -A         |
| Pten                 | 38.43% | 1del  | 19: 32758457  | -T         |
| Tu1 - Region2        |        |       |               |            |
| Gene                 | MRF    | Mut   | Position      | Indel      |
| Brca2                | 12.50% | 3del  | 5: 150529485  | -CCT       |
| Brca2                | 7.57%  | 1del  | 5: 150529488  | -C         |
| Apc                  | 5.88%  | 1ins  | 18: 34261059  | +T         |
| Apc                  | 11.11% | 1ins  | 18: 34261059  | +A         |
| Smad4                | 21.56% | 1del  | 18: 73675801  | -A         |
| Cdkn2a(Ex2)          | 20.46% | 1del  | 4: 89276739   | -G         |
| Trp53                | 0.20%  | 2del  | 11: 69587437  | -AG        |
| Trp53                | 8.23%  | 2del  | 11: 69587438  | -GT        |
| Trp53                | 0.21%  | 11ins | 11: 69587441  | +CCA...TCC |
| Trp53                | 0.24%  | 12ins | 11: 69587441  | +CCA...CCC |
| Trp53                | 0.25%  | 2ins  | 11: 69587441  | +CC        |
| Trp53                | 0.38%  | 1ins  | 11: 69587441  | +C         |
| Trp53                | 5.10%  | 12ins | 11: 69587441  | +CCA...CCA |
| Trp53                | 16.65% | 74del | 11: 69587441  | -AAG...GCC |
| Trp53                | 0.21%  | 1ins  | 11: 69587446  | +A         |
| Arid1a               | 2.97%  | 5del  | 4: 133723004  | -TACGG     |
| Tet2                 | 7.43%  | 2del  | 3: 133485657  | -AT        |
| Tet2                 | 9.48%  | 14del | 3: 133485658  | -TAT...ACT |
| Pten                 | 4.86%  | 1del  | 19: 32758456  | -A         |

| Tu1 - Region3 |        |        |               |            |
|---------------|--------|--------|---------------|------------|
| Gene          | MRF    | Mut    | Position      | Indel      |
| Brca1         | 11.93% | 11del  | 11: 101549007 | -GAC...AGA |
| Brca1         | 6.40%  | 9del   | 11: 101549019 | -CGGACACTC |
| Cdkn2a(Ex1β)  | 1.00%  | 3del   | 4: 89294435   | -ATC       |
| Cdkn2a(Ex1β)  | 19.48% | 3del   | 4: 89294436   | -TCG       |
| Apc           | 2.34%  | 1ins   | 18: 34261059  | +T         |
| Apc           | 15.99% | 1ins   | 18: 34261059  | +A         |
| Smad4         | 6.21%  | 2del   | 18: 73675798  | -GT        |
| Smad4         | 12.30% | 1del   | 18: 73675801  | -A         |
| Cdkn2a(Ex2)   | 40.58% | 1del   | 4: 89276739   | -G         |
| Trp53         | 0.75%  | 2del   | 11: 69587437  | -AG        |
| Trp53         | 27.32% | 2del   | 11: 69587438  | -GT        |
| Trp53         | 0.72%  | 2del   | 11: 69587439  | -TG        |
| Trp53         | 0.24%  | 74del  | 11: 69587440  | -GAA...TGC |
| Trp53         | 0.33%  | 12ins  | 11: 69587440  | +TCC...TCC |
| Trp53         | 0.32%  | 2ins   | 11: 69587441  | +CC        |
| Trp53         | 0.34%  | 11ins  | 11: 69587441  | +CCA...TCC |
| Trp53         | 0.37%  | 12ins  | 11: 69587441  | +CCA...CCC |
| Trp53         | 0.66%  | 1ins   | 11: 69587441  | +C         |
| Trp53         | 10.09% | 12ins  | 11: 69587441  | +CCA...CCA |
| Trp53         | 37.12% | 74del  | 11: 69587441  | -AAG...GCC |
| Trp53         | 0.45%  | 1ins   | 11: 69587446  | +A         |
| Arid1a        | 10.95% | 5del   | 4: 133723004  | -TACGG     |
| Arid1a        | 16.93% | 3del   | 4: 133723008  | -GCT       |
| Tet2          | 21.18% | 2del   | 3: 133485657  | -AT        |
| Tet2          | 14.29% | 1del   | 3: 133485658  | -T         |
| Pten          | 1.72%  | 1del   | 19: 32758456  | -A         |
| Pten          | 30.86% | 1del   | 19: 32758457  | -T         |
| Tu2           |        |        |               |            |
| Gene          | MRF    | Mut    | Position      | Indel      |
| Apc           | 7.18%  | 15del  | 18: 34261056  | -AAG...TGA |
| Apc           | 4.99%  | 15ins  | 18: 34261057  | +CTG...AGT |
| Apc           | 4.35%  | 1ins   | 18: 34261059  | +T         |
| Cdkn2a(Ex2)   | 0.29%  | 7del   | 4: 89276737   | -GCGGAAC   |
| Cdkn2a(Ex2)   | 0.28%  | 1del   | 4: 89276739   | -G         |
| Arid1a        | 0.41%  | 1del   | 4: 133723007  | -G         |
| Arid1a        | 1.29%  | 2del   | 4: 133723007  | -GG        |
| Tet2          | 10.53% | 178del | 3: 133485574  | -CAT...TTC |
| Tet2          | 1.74%  | 18del  | 3: 133485647  | -TGC...TGT |
| Tet2          | 6.87%  | 1del   | 3: 133485658  | -T         |
| Pten          | 8.87%  | 123del | 19: 32758338  | -AGC...CAA |
| Pten          | 1.19%  | 31del  | 19: 32758440  | -AGA...GTT |
| Pten          | 2.00%  | 1ins   | 19: 32758457  | +T         |

| <b>Tu3</b>   |            |            |                 |              |
|--------------|------------|------------|-----------------|--------------|
| <b>Gene</b>  | <b>MRF</b> | <b>Mut</b> | <b>Position</b> | <b>Indel</b> |
| Brca1        | 1.43%      | 1del       | 11: 101549018   | -T           |
| Brca2        | 1.64%      | 10del      | 5: 150529476    | -ACC...AGC   |
| Cdkn2a(Ex1β) | 2.99%      | 9del       | 4: 89294435     | -ATCGCACGA   |
| Cdkn2a(Ex1β) | 1.19%      | 3del       | 4: 89294436     | -TCG         |
| Apc          | 1.65%      | 6del       | 18: 34261051    | -AAAGCA      |
| Apc          | 1.52%      | 1del       | 18: 34261058    | -G           |
| Apc          | 0.23%      | 1ins       | 18: 34261059    | +T           |
| Apc          | 1.56%      | 1ins       | 18: 34261059    | +A           |
| Smad4        | 5.59%      | 6del       | 18: 73675795    | -ATAGTG      |
| Smad4        | 3.33%      | 3del       | 18: 73675798    | -GTG         |
| Cdkn2a(Ex2)  | 4.39%      | 1del       | 4: 89276739     | -G           |
| Trp53        | 2.23%      | 2del       | 11: 69587438    | -GT          |
| Trp53        | 2.46%      | 8del       | 11: 69587439    | -TGAAGCCC    |
| Trp53        | 0.85%      | 5ins       | 11: 69587440    | +TAGAA       |
| Trp53        | 0.64%      | 15ins      | 11: 69587443    | +CTT...AAT   |
| Arid1a       | 1.89%      | 8del       | 4: 133722998    | -CCACCATA    |
| Arid1a       | 1.91%      | 8del       | 4: 133723001    | -CCATACGG    |
| Arid1a       | 2.51%      | 2del       | 4: 133723009    | -CT          |
| Tet2         | 9.35%      | 2del       | 3: 133485657    | -AT          |
| Tet2         | 2.15%      | 1del       | 3: 133485658    | -T           |
| Pten         | 0.38%      | 2del       | 19: 32758457    | -TC          |
| Pten         | 1.59%      | 1del       | 19: 32758457    | -T           |
| Pten         | 2.94%      | 1ins       | 19: 32758457    | +T           |
| Pten         | 3.15%      | 3del       | 19: 32758458    | -CAA         |
| <b>Tu4</b>   |            |            |                 |              |
| <b>Gene</b>  | <b>MRF</b> | <b>Mut</b> | <b>Position</b> | <b>Indel</b> |
| Cdkn2a(Ex1β) | 3.04%      | 1ins       | 4: 89294436     | +T           |
| Apc          | 1.84%      | 3del       | 18: 34261058    | -GTT         |
| Trp53        | 3.73%      | 1del       | 11: 69587440    | -G           |
| Trp53        | 3.87%      | 1ins       | 11: 69587440    | +G           |
| Arid1a       | 3.56%      | 1del       | 4: 133723007    | -G           |
| Arid1a       | 2.61%      | 1ins       | 4: 133723009    | +A           |
| Arid1a       | 3.45%      | 1del       | 4: 133723009    | -C           |
| Tet2         | 4.37%      | 1ins       | 3: 133485657    | +A           |
| Tet2         | 3.27%      | 1del       | 3: 133485658    | -T           |
| Pten         | 2.62%      | 201del     | 19: 32758270    | -AGC...GTT   |
| Pten         | 1.62%      | 15del      | 19: 32758447    | -ACA...AAA   |
| Pten         | 0.25%      | 2del       | 19: 32758456    | -AT          |
| Pten         | 7.49%      | 2del       | 19: 32758457    | -TC          |
| <b>Tu5</b>   |            |            |                 |              |
| <b>Gene</b>  | <b>MRF</b> | <b>Mut</b> | <b>Position</b> | <b>Indel</b> |
| Apc          | 4.08%      | 6del       | 18: 34261053    | -AGCAAG      |
| Apc          | 4.59%      | 1ins       | 18: 34261058    | +G           |
| Apc          | 5.01%      | 1ins       | 18: 34261059    | +T           |
| Smad4        | 5.67%      | 3del       | 18: 73675798    | -GTG         |
| Cdkn2a(Ex2)  | 10.28%     | 14del      | 4: 89276738     | -CGG...TAT   |
| Trp53        | 8.23%      | 1del       | 11: 69587439    | -T           |
| Trp53        | 6.16%      | 28del      | 11: 69587440    | -GAA...CTG   |
| Trp53        | 6.62%      | 11del      | 11: 69587440    | -GAA...CCG   |
| Trp53        | 7.53%      | 1del       | 11: 69587440    | -G           |
| Arid1a       | 7.78%      | 3del       | 4: 133723006    | -CGG         |
| Tet2         | 9.42%      | 8del       | 3: 133485653    | -CTGGATAT    |
| Tet2         | 8.63%      | 2del       | 3: 133485657    | -AT          |
| Tet2         | 9.96%      | 14del      | 3: 133485658    | -TAT...ACT   |
| Pten         | 8.28%      | 34del      | 19: 32758439    | -CAG...TAG   |
| Pten         | 0.43%      | 1ins       | 19: 32758456    | +C           |
| Pten         | 15.40%     | 1ins       | 19: 32758457    | +T           |



| <b>Tu6</b>   |            |            |                 |              |
|--------------|------------|------------|-----------------|--------------|
| <b>Gene</b>  | <b>MRF</b> | <b>Mut</b> | <b>Position</b> | <b>Indel</b> |
| Smad4        | 1.33       | 14del      | 18: 73675797    | -AGT...TTC   |
| Smad4        | 17.96      | 7del       | 18: 73675800    | -GATATGG     |
| Smad4        | 19.93      | 2del       | 18: 73675798    | -GT          |
| Arid1a       | 19.89      | 6del       | 4: 133723007    | -GGCTGA      |
| Arid1a       | 20.98      | 3del       | 4: 133723006    | -CGG         |
| Cdkn2a(Ex2)  | 19.79      | 1del       | 4: 89276739     | -G           |
| Apc          | 36.13      | 1ins       | 18: 34261059    | +T           |
| Tet2         | 0.22       | 2del       | 3:133485657     | -AT          |
| Tet2         | 2.10       | 11del      | 3:133485654     | -TGG...TGT   |
| Tet2         | 17.22      | 1del       | 3:133485658     | -T           |
| Pten         | 0.71       | 1ins       | 19: 32758457    | +C           |
| Pten         | 1.45       | 1del       | 19: 32758456    | -A           |
| Pten         | 12.61      | 7del       | 19: 32758456    | -ATCAAAG     |
| Pten         | 16.21      | 1del       | 19: 32758457    | -T           |
| <b>Tu7</b>   |            |            |                 |              |
| <b>Gene</b>  | <b>MRF</b> | <b>Mut</b> | <b>Position</b> | <b>Indel</b> |
| Pten         | 19.04      | 25del      | 19: 32758453    | -ATC...GAA   |
| Pten         | 21.61      | 1del       | 19: 32758456    | -A           |
| <b>Tu8</b>   |            |            |                 |              |
| <b>Gene</b>  | <b>MRF</b> | <b>Mut</b> | <b>Position</b> | <b>Indel</b> |
| Brca1        | 0.74       | 59ins      | 11: 101549027   | +TTG...TAG   |
| Pten         | 12.98      | 1ins       | 19: 32758457    | +T           |
| Pten         | 14.93      | 1del       | 19: 32758456    | -A           |
| <b>Tu9</b>   |            |            |                 |              |
| <b>Gene</b>  | <b>MRF</b> | <b>Mut</b> | <b>Position</b> | <b>Indel</b> |
| Pten         | 0.40       | 1ins       | 19: 32758457    | +A           |
| Pten         | 0.51       | 1ins       | 19: 32758457    | +C           |
| Pten         | 8.37       | 1del       | 19: 32758457    | -T           |
| Pten         | 15.19      | 1ins       | 19: 32758456    | +A           |
| <b>Tu10</b>  |            |            |                 |              |
| <b>Gene</b>  | <b>MRF</b> | <b>Mut</b> | <b>Position</b> | <b>Indel</b> |
| Cdkn2a(Ex2)  | 31.86      | 1del       | 4: 89276739     | -G           |
| Apc          | 24.96      | 2ins       | 18: 34261059    | +TT          |
| Apc          | 26.78      | 1ins       | 18: 34261058    | +G           |
| Tet2         | 27.18      | 1del       | 3:133485658     | -T           |
| Pten         | 3.45       | 1del       | 19: 32758456    | -A           |
| Pten         | 37.25      | 1del       | 19: 32758457    | -T           |
| <b>Tu11</b>  |            |            |                 |              |
| <b>Gene</b>  | <b>MRF</b> | <b>Mut</b> | <b>Position</b> | <b>Indel</b> |
| Apc          | 0.24       | 1ins       | 18: 34261059    | +T           |
| Apc          | 0.24       | 1ins       | 18: 34261059    | +A           |
| Pten         | 30.55      | 1del       | 19: 32758456    | -A           |
| <b>Tu12</b>  |            |            |                 |              |
| <b>Gene</b>  | <b>MRF</b> | <b>Mut</b> | <b>Position</b> | <b>Indel</b> |
| Cdkn2a(Ex1β) | 1.73       | 1ins       | 4: 89294435     | +A           |
| Pten         | 3.47       | 1del       | 19: 32758457    | -T           |
| Pten         | 3.59       | 1del       | 19: 32758456    | -A           |
| <b>Tu13</b>  |            |            |                 |              |
| <b>Gene</b>  | <b>MRF</b> | <b>Mut</b> | <b>Position</b> | <b>Indel</b> |
| Pten         | 6.75       | 1del       | 19: 32758457    | -T           |
| Pten         | 20.25      | 1del       | 19: 32758456    | -A           |
| <b>Tu14</b>  |            |            |                 |              |
| <b>Gene</b>  | <b>MRF</b> | <b>Mut</b> | <b>Position</b> | <b>Indel</b> |
| Brca1        | 1.52       | 3del       | 11: 101549016   | -GAT         |
| Cdkn2a(Ex1β) | 1.93       | 6del       | 4: 89294430     | -CCGGGA      |
| Arid1a       | 2.19       | 3del       | 4: 133723006    | -CGG         |
| Cdkn2a(Ex2)  | 1.59       | 1del       | 4: 89276739     | -G           |
| Apc          | 1.56       | 1ins       | 18: 34261058    | +G           |
| Apc          | 1.60       | 3del       | 18: 34261058    | -GTT         |
| Apc          | 3.25       | 1ins       | 18: 34261059    | +T           |
| Tet2         | 0.21       | 1del       | 3: 133485658    | -T           |
| Pten         | 2.47       | 1del       | 19: 32758456    | -A           |
| Pten         | 3.13       | 1del       | 19: 32758457    | -T           |

| <b>Tu15</b>  |            |            |                 |              |
|--------------|------------|------------|-----------------|--------------|
| <b>Gene</b>  | <b>MRF</b> | <b>Mut</b> | <b>Position</b> | <b>Indel</b> |
| Apc          | 4.70       | 1ins       | 18: 34261059    | +T           |
| Apc          | 5.10       | 2ins       | 18: 34261059    | +TT          |
| Pten         | 4.46       | 1del       | 19: 32758456    | -A           |
| Pten         | 6.44       | 1del       | 19: 32758457    | -T           |
| <b>Tu16</b>  |            |            |                 |              |
| <b>Gene</b>  | <b>MRF</b> | <b>Mut</b> | <b>Position</b> | <b>Indel</b> |
| Smad4        | 7.33       | 1del       | 18: 73675801    | -A           |
| Apc          | 9.47       | 1ins       | 18: 34261056    | +A           |
| Apc          | 9.54       | 2del       | 18: 34261059    | -TT          |
| Pten         | 18.87      | 1del       | 19: 32758456    | -A           |
| <b>Tu17</b>  |            |            |                 |              |
| <b>Gene</b>  | <b>MRF</b> | <b>Mut</b> | <b>Position</b> | <b>Indel</b> |
| Smad4        | 0.32       | 2del       | 18: 73675798    | -GT          |
| Smad4        | 0.36       | 7del       | 18: 73675800    | -GATATGG     |
| Cdkn2a(Ex2)  | 0.20       | 1del       | 4: 89276739     | -G           |
| Apc          | 4.14       | 1ins       | 18: 34261059    | +T           |
| Tet2         | 1.77       | 1ins       | 3:133485659     | +A           |
| Tet2         | 2.04       | 1del       | 3:133485658     | -T           |
| Pten         | 2.72       | 1del       | 19: 32758456    | -A           |
| Pten         | 2.74       | 1del       | 19: 32758457    | -T           |
| <b>Tu18</b>  |            |            |                 |              |
| <b>Gene</b>  | <b>MRF</b> | <b>Mut</b> | <b>Position</b> | <b>Indel</b> |
| Brca2        | 0.27       | 1del       | 5: 150529488    | -C           |
| p53          | 8.13       | 12del      | 11: 69587427    | -TGA...AAG   |
| Apc          | 1.04       | 1ins       | 18: 34261061    | +G           |
| Apc          | 7.50       | 1ins       | 18: 34261059    | +T           |
| Pten         | 0.27       | 22del      | 19: 32758448    | -CAG...CGT   |
| Pten         | 0.28       | 1del       | 19: 32758457    | -T           |
| Pten         | 8.12       | 1del       | 19: 32758456    | -A           |
| <b>Tu19</b>  |            |            |                 |              |
| <b>Gene</b>  | <b>MRF</b> | <b>Mut</b> | <b>Position</b> | <b>Indel</b> |
| Trp53        | 9.97       | 1ins       | 11: 69587440    | +A           |
| Apc          | 8.83       | 4del       | 18: 34261052    | -AAGC        |
| Apc          | 9.82       | 1ins       | 18: 34261059    | +T           |
| Tet2         | 11.20      | 4del       | 3: 133485654    | -TGGA        |
| Tet2         | 11.78      | 1del       | 3: 133485658    | -T           |
| Pten         | 0.40       | 1ins       | 19: 32758456    | +A           |
| Pten         | 9.40       | 1del       | 19: 32758457    | -T           |
| Pten         | 10.84      | 1del       | 19: 32758456    | -A           |
| <b>Tu20</b>  |            |            |                 |              |
| <b>Gene</b>  | <b>MRF</b> | <b>Mut</b> | <b>Position</b> | <b>Indel</b> |
| Cdkn2a(Ex1β) | 3.55       | 1ins       | 4: 89294436     | +T           |
| Arid1a       | 9.85       | 1del       | 4: 133723007    | -G           |
| Apc          | 2.92       | 1ins       | 18: 34261059    | +C           |
| Apc          | 6.38       | 2ins       | 18: 34261059    | +TT          |
| Apc          | 15.18      | 1ins       | 18: 34261059    | +T           |
| Tet2         | 2.89       | 2del       | 3:133485657     | -AT          |
| Tet2         | 14.21      | 1del       | 3:133485658     | -T           |
| Pten         | 12.06      | 1ins       | 19: 32758457    | +T           |
| Pten         | 12.93      | 1del       | 19: 32758456    | -A           |

| Tu21        |       |        |              |            |
|-------------|-------|--------|--------------|------------|
| Gene        | MRF   | Mut    | Position     | Indel      |
| Smad4       | 3.22  | 1del   | 18: 73675801 | -A         |
| Arid1a      | 3.94  | 1del   | 4: 133723007 | -G         |
| Cdkn2a(Ex2) | 4.59  | 1ins   | 4: 89276740  | +A         |
| Apc         | 2.75  | 7del   | 18: 34261052 | -AAGCAAG   |
| Apc         | 2.96  | 2del   | 18: 34261055 | -CA        |
| Apc         | 3.02  | 1del   | 18: 34261058 | -G         |
| Apc         | 3.54  | 1ins   | 18: 34261059 | +T         |
| Apc         | 3.86  | 1ins   | 18: 34261059 | +A         |
| Apc         | 4.05  | 1ins   | 18: 34261058 | +G         |
| Apc         | 4.66  | 13del  | 18: 34261045 | -GTT...CAA |
| Apc         | 5.06  | 3del   | 18: 34261058 | -GTT       |
| Apc         | 8.49  | 15del  | 18: 34261056 | -AAG...TGA |
| Tet2        | 10.96 | 1del   | 3:133485658  | -T         |
| Pten        | 0.94  | 35ins  | 19: 32758590 | +AGA...GAC |
| Pten        | 1.14  | 1del   | 19: 32758456 | -A         |
| Pten        | 2.98  | 2del   | 19: 32758455 | -CA        |
| Pten        | 4.40  | 6del   | 19: 32758457 | -TCAAAG    |
| Pten        | 5.14  | 152del | 19: 32758305 | -CCA...TCA |
| Pten        | 11.65 | 1del   | 19: 32758457 | -T         |

**Supplementary Table 3. Overview of cohorts and tumor prevalence in CCl<sub>4</sub> treated wild type mice and Alb-Cre;Kras<sup>LSL-G12D/+</sup> upon 18sgRNA CRISPR/Cas9 mutagenesis.** In the carbon tetrachloride (CCl<sub>4</sub>) treated cohorts, wild type mice received *hSpCas9* only (control cohort) or *hSpCas9* and 18 sgRNAs (experimental cohort) by hydrodynamic tail vein injection (HTVI). Beginning two weeks after HTVI mice were treated nine times with a weekly intraperitoneal injection of 1μL/g body weight 10% CCl<sub>4</sub>. Whereas no tumors were observed in the control cohort by magnetic resonance imaging (MRI) screening or at necropsy, 7 of 16 mice in the experimental cohort developed signs of illness between 30 to 60 weeks post HTVI. All of these mice had HCCs at necropsy. 35 tumors were collected and analyzed so far. In the *Alb-Cre;Kras<sup>LSL-G12D/+</sup>* cohorts, three out of three mice in the experimental cohorts developed signs of illness between 21 and 32 weeks post HTVI. Six tumors were collected and analyzed. None of the control animals developed ICCs or HCCs within this time span.

| Cohort                                                | Alive          | Dead           |                 |                                          |
|-------------------------------------------------------|----------------|----------------|-----------------|------------------------------------------|
|                                                       |                | number of mice | weeks post HTVI | necropsy                                 |
| wild type & CCl <sub>4</sub>                          | number of mice | number of mice | weeks post HTVI | necropsy                                 |
| <i>hSpCas9</i> only<br>(control cohort)               | 4 (> 50 weeks) | 4              | 20-30           | no HCC/ ICC                              |
| <i>hSpCas9</i> &<br>18 sgRNA<br>(experimental cohort) | 9 (> 60 weeks) | 7              | 30-60           | all 7 mice had HCCs<br>(Tu28-Tu62)       |
| <i>Alb-Cre;<br/>Kras<sup>LSL-G12D/+</sup></i>         | number of mice | number of mice | weeks post HTVI | necropsy                                 |
| <i>hSpCas9</i> only<br>(control cohort)               | -              | 8              | 20-30           | no HCC/ ICC                              |
| <i>hSpCas9</i> &<br>18 sgRNA<br>(experimental cohort) | -              | 3              | 21-32           | all 3 mice had ICCs/ HCCs<br>(Tu22-Tu27) |

**Supplementary Table 4. Indel analysis in primary tumors and metastases derived from one mouse injected with *hSpCas9* and 18 sgRNAs.** CRISPR-SB vectors expressing *hSpCas9* and 18 sgRNAs (targeting 18 different tumor suppressor genes) were delivered into livers of *Alb-Cre;Kras<sup>LSL-G12D/+</sup>* mice using hydrodynamic tail vein injection (HTVI). While most liver tumors were detected 20 to 30 weeks post HTVI due to regular MRI screening and were thus small (1-3mm), one animal developed a large early onset ICC 20 weeks post HTVI (before start of MRI screening) with multiple metastases to lymph nodes, peritoneum and lungs (see Figure 4). DNA was isolated from different areas of the primary tumor (n=10) and from numerous metastases (n=9). Cell lines were generated from primary tumor (n=9) and metastases (n=9). CRISPR/Cas9 target sites in all samples (n=37) were amplified and sequenced using amplicon-based next-generation sequencing. Indel analysis revealed three independent primary tumors (Tu22, Tu23, Tu24), with the largest part of the tumor mass being formed by Tu24 (eight out of ten samples). The table below shows indels detected in the Tu22, Tu23 and Tu24 (for Tu24 two representative samples are shown) and corresponding cell lines (for Tu23 and Tu24). Indels with a mutant read frequency (MRF) of 0.2% or higher are shown. This cut-off takes technical sequencing errors into account.

| <b>Tu22</b>           |            |            |                 |              |
|-----------------------|------------|------------|-----------------|--------------|
| <b>Gene</b>           | <b>MRF</b> | <b>Mut</b> | <b>Position</b> | <b>Indel</b> |
| Apc                   | 6.8%       | 1ins       | 18:34261059     | +T           |
| Apc                   | 3.9%       | 3del       | 18:34261058     | -GTT         |
| Apc                   | 3.8%       | 4del       | 18:34261052     | -AAGC        |
| Arid1b                | 0.9%       | 16del      | 17:5040686      | -CGG...GCA   |
| Arid1b                | 24.0%      | 1del       | 17:5040687      | -G           |
| Cdkn2a(Ex2)           | 8.2%       | 1del       | 4:89276739      | -G           |
| Errfi1                | 0.6%       | 2del       | 4:150866429     | -GT          |
| Errfi1                | 5.1%       | 1ins       | 4:150866431     | +G           |
| Errfi1                | 6.9%       | 4del       | 4:150866427     | -GCGT        |
| Errfi1                | 10.0%      | 1del       | 4:150866431     | -G           |
| Igsf10                | 11.9%      | 1del       | 3:59336469      | -C           |
| Pten                  | 19.4%      | 1del       | 19:32758457     | -T           |
| Pten                  | 5.9%       | 1del       | 19:32758456     | -A           |
| Tet2                  | 9.0%       | 1del       | 3:133485658     | -T           |
| Tet2                  | 8.4%       | 1ins       | 3:133485658     | +T           |
| Tet2                  | 7.8%       | 2del       | 3:133485657     | -AT          |
| Tet2                  | 9.2%       | 2del       | 3:133485656     | -GA          |
| Trp53                 | 8.2 %      | 1del       | 11: 69587440    | -G           |
| <b>Tu23</b>           |            |            |                 |              |
| <b>Gene</b>           | <b>MRF</b> | <b>Mut</b> | <b>Position</b> | <b>Indel</b> |
| Arid1b                | 31.4%      | 2del       | 17:5040686      | -CG          |
| Arid2                 | 33.4%      | 1del       | 15: 9628729     | -G           |
| Igsf10                | 15.9%      | 1del       | 3:59336469      | -C           |
| Igsf10                | 17.4%      | 5del       | 3:59336465      | -AACGC       |
| Pten                  | 15.7%      | 1ins       | 19:32758457     | +T           |
| Pten                  | 27.8%      | 1del       | 19:32758456     | -A           |
| Pten                  | 20.1%      | 1del       | 19:32758457     | -T           |
| <b>Tu23 cell line</b> |            |            |                 |              |
| <b>Gene</b>           | <b>MRF</b> | <b>Mut</b> | <b>Position</b> | <b>Indel</b> |
| Arid1b                | 52.4%      | 2del       | 17:5040686      | -CG          |
| Arid2                 | 99.8%      | 1del       | 15: 9628729     | -G           |
| Igsf10                | 51.2%      | 1del       | 3:59336469      | -C           |
| Igsf10                | 48.7%      | 5del       | 3:59336465      | -AACGC       |
| Pten                  | 50.5%      | 1ins       | 19:32758457     | +T           |
| Pten                  | 30.1%      | 1del       | 19:32758456     | -A           |
| Pten                  | 19.3%      | 1del       | 19:32758457     | -T           |

| <b>Tu24.1</b>            |            |            |                 |              |
|--------------------------|------------|------------|-----------------|--------------|
| <b>Gene</b>              | <b>MRF</b> | <b>Mut</b> | <b>Position</b> | <b>Indel</b> |
| Arid1b                   | 39.2%      | 1del       | 17:5040686      | -C           |
| Arid1b                   | 46.6%      | 16del      | 17:5040686      | -CGG...GCA   |
| Arid2                    | 76.2%      | 3del       | 15: 9628729     | -GCG         |
| Cdkn2a(Ex1β)             | 73.1%      | 37del      | 4:89294408      | -CGC...GAA   |
| Errfi1                   | 73.6%      | 2del       | 4:150866429     | -GT          |
| Irf2                     | 75.3%      | 1ins       | 8:46806498      | +T           |
| Pten                     | 41.2%      | 4del       | 19:32758457     | -TCAA        |
| Pten                     | 43.6%      | 2ins       | 19:32758457     | +TG          |
| Trp53                    | 43.1%      | 1del       | 11:69587440     | -G           |
| <b>Tu24.1 cell line</b>  |            |            |                 |              |
| <b>Gene</b>              | <b>MRF</b> | <b>Mut</b> | <b>Position</b> | <b>Indel</b> |
| Arid1b                   | 47.2%      | 1del       | 17:5040686      | -C           |
| Arid1b                   | 52.8%      | 16del      | 17:5040686      | -CGG...GCA   |
| Arid2                    | 99.4%      | 3del       | 15: 9628729     | -GCG         |
| Cdkn2a(Ex1β)             | 99.6%      | 37del      | 4:89294408      | -CGC...GAA   |
| Errfi1                   | 99.8%      | 2del       | 4:150866429     | -GT          |
| Irf2                     | 99.8%      | 1ins       | 8:46806498      | +T           |
| Pten                     | 50.5%      | 4del       | 19:32758457     | -TCAA        |
| Pten                     | 49.2%      | 2ins       | 19:32758457     | +TG          |
| Trp53                    | 50.6%      | 1del       | 11:69587440     | -G           |
| <b>Tu24.2</b>            |            |            |                 |              |
| <b>Gene</b>              | <b>MRF</b> | <b>Mut</b> | <b>Position</b> | <b>Indel</b> |
| Arid1b                   | 37.8%      | 1del       | 17:5040686      | -C           |
| Arid1b                   | 43.7%      | 16del      | 17:5040686      | -CGG...GCA   |
| Arid2                    | 75.1%      | 3del       | 15: 9628729     | -GCG         |
| Cdkn2a(Ex1β)             | 77.4%      | 37del      | 4:89294408      | -CGC...GAA   |
| Errfi1                   | 68.4%      | 2del       | 4:150866429     | -GT          |
| Irf2                     | 69.4%      | 1ins       | 8:46806498      | +T           |
| Pten                     | 37.6%      | 4del       | 19:32758457     | -TCAA        |
| Pten                     | 46.0%      | 2ins       | 19:32758457     | +TG          |
| Trp53                    | 41.2%      | 1del       | 11:69587440     | -G           |
| <b>Tu24.2 cell line</b>  |            |            |                 |              |
| <b>Gene</b>              | <b>MRF</b> | <b>Mut</b> | <b>Position</b> | <b>Indel</b> |
| Arid1b                   | 46.0%      | 1del       | 17:5040686      | -C           |
| Arid1b                   | 54.0%      | 16del      | 17:5040686      | -CGG...GCA   |
| Arid2                    | 99.6%      | 3del       | 15: 9628729     | -GCG         |
| Cdkn2a(Ex1β)             | 99.7%      | 37del      | 4:89294408      | -CGC...GAA   |
| Errfi1                   | 99.7%      | 2del       | 4:150866429     | -GT          |
| Irf2                     | 99.8%      | 1ins       | 8:46806498      | +T           |
| Pten                     | 48.7%      | 4del       | 19:32758457     | -TCAA        |
| Pten                     | 51.1%      | 2ins       | 19:32758457     | +TG          |
| Trp53                    | 53.3%      | 1del       | 11:69587440     | -G           |
| <b>Met24.1</b>           |            |            |                 |              |
| <b>Gene</b>              | <b>MRF</b> | <b>Mut</b> | <b>Position</b> | <b>Indel</b> |
| Arid1b                   | 35.8%      | 1del       | 17:5040686      | -C           |
| Arid1b                   | 43.8%      | 16del      | 17:5040686      | -CGG...GCA   |
| Arid2                    | 68.5%      | 3del       | 15: 9628729     | -GCG         |
| Cdkn2a(Ex1β)             | 72.3%      | 37del      | 4:89294408      | -CGC...GAA   |
| Errfi1                   | 64.3%      | 2del       | 4:150866429     | -GT          |
| Irf2                     | 64.0%      | 1ins       | 8:46806498      | +T           |
| Pten                     | 39.2%      | 4del       | 19:32758457     | -TCAA        |
| Pten                     | 43.4%      | 2ins       | 19:32758457     | +TG          |
| Trp53                    | 37.6%      | 1del       | 11:69587440     | -G           |
| <b>Met24.1 cell line</b> |            |            |                 |              |
| <b>Gene</b>              | <b>MRF</b> | <b>Mut</b> | <b>Position</b> | <b>Indel</b> |
| Arid1b                   | 44.9%      | 1del       | 17:5040686      | -C           |
| Arid1b                   | 54.9%      | 16del      | 17:5040686      | -CGG...GCA   |
| Arid2                    | 99.2%      | 3del       | 15: 9628729     | -GCG         |
| Cdkn2a(Ex1β)             | 99.4%      | 37del      | 4:89294408      | -CGC...GAA   |
| Errfi1                   | 99.0%      | 2del       | 4:150866429     | -GT          |
| Irf2                     | 99.2%      | 1ins       | 8:46806498      | +T           |
| Pten                     | 47.0%      | 4del       | 19:32758457     | -TCAA        |
| Pten                     | 52.8%      | 2ins       | 19:32758457     | +TG          |
| Trp53                    | 49.3%      | 1del       | 11:69587440     | -G           |

| <b>Met24.2</b>           |            |            |                 |              |
|--------------------------|------------|------------|-----------------|--------------|
| <b>Gene</b>              | <b>MRF</b> | <b>Mut</b> | <b>Position</b> | <b>Indel</b> |
| Arid1b                   | 34.5%      | 1del       | 17:5040686      | -C           |
| Arid1b                   | 43.1%      | 16del      | 17:5040686      | -CGG...GCA   |
| Arid2                    | 75.8%      | 3del       | 15: 9628729     | -GCG         |
| Cdkn2a(Ex1β)             | 80.0%      | 37del      | 4:89294408      | -CGC...GAA   |
| Errfi1                   | 66.1%      | 2del       | 4:150866429     | -GT          |
| Irf2                     | 59.3%      | 1ins       | 8:46806498      | +T           |
| Pten                     | 39.1%      | 4del       | 19:32758457     | -TCAA        |
| Pten                     | 42.7%      | 2ins       | 19:32758457     | +TG          |
| Trp53                    | 41.8%      | 1del       | 11:69587440     | -G           |
| <b>Met24.2 cell line</b> |            |            |                 |              |
| <b>Gene</b>              | <b>MRF</b> | <b>Mut</b> | <b>Position</b> | <b>Indel</b> |
| Arid1b                   | 45.7%      | 1del       | 17:5040686      | -C           |
| Arid1b                   | 54.1%      | 16del      | 17:5040686      | -CGG...GCA   |
| Arid2                    | 99.4%      | 3del       | 15: 9628729     | -GCG         |
| Cdkn2a(Ex1β)             | 99.9%      | 37del      | 4:89294408      | -CGC...GAA   |
| Errfi1                   | 98.7%      | 2del       | 4:150866429     | -GT          |
| Irf2                     | 99.3%      | 1ins       | 8:46806498      | +T           |
| Pten                     | 45.6%      | 4del       | 19:32758457     | -TCAA        |
| Pten                     | 54.3%      | 2ins       | 19:32758457     | +TG          |
| Trp53                    | 51.6%      | 1del       | 11:69587440     | -G           |

**Supplementary Table 5. Mono- versus biallelic mutations at CRISPR/Cas9 target sites.** Analysis of the allelic status of CRISPR/Cas9 target sites in cell lines derived from Tu23 and Tu24. Target sites were regarded as being altered 'homozygously' if no wild type (wt) reads for the respective amplicon emerged from amplicon-based next generation sequencing. In this case, both alleles harbored indels and/or large deletions (fusions). The same indel or large deletion at both alleles indicates either independent identical CRISPR/Cas9-induced mutations on each allele or loss of heterozygosity. Target sites were considered as being altered 'heterozygously' if 50% of reads for the respective amplicon harbored an indel or large deletion and 50% of reads were wt.

| Target site        | NGS and fusion PCR results        | Heterozygous | Homozygous |
|--------------------|-----------------------------------|--------------|------------|
| <b>Tu23</b>        |                                   |              |            |
| Arid1b             | 50% indel - 50% wt                | 1            |            |
| Arid2              | 100% indel - no wt                |              | 1          |
| Igsf10             | 50% indel - 50% indel             |              | 1          |
| Pten               | 28% indel - 20% indel - 16% indel |              | 1          |
| Arid1a             | fusion - wt                       | 1            |            |
| Cdkn2b             | fusion - no wt                    |              | 1          |
| Errfi1             | fusion - fusion                   |              | 1          |
| <b>Tu24</b>        |                                   |              |            |
| Trp53              | 50% indel - 50% wt                | 1            |            |
| Irf2               | 100% indel - no wt                |              | 1          |
| Errfi1             | 100% indel - no wt                |              | 1          |
| Pten               | 50% indel - 50% indel             |              | 1          |
| Arid1b             | 50% indel - 50% indel             |              | 1          |
| Cdkn2a-Ex1 $\beta$ | fusion - indel                    |              | 1          |
| Cdkn2a-Ex2         | fusion - no wt                    |              | 1          |
|                    | <b>sum</b>                        | <b>3</b>     | <b>11</b>  |
|                    | <b>percent</b>                    | <b>21%</b>   | <b>79%</b> |



**Supplementary Table 6. Sequences of the 18 sgRNAs used to target tumor suppressor genes in the mouse liver by hydrodynamic tail vein injection (HTVI).**

| Gene                  | Transcript (Ensembl transcript ID)                                 | CCDS                   | sgRNA sequence (PAM)        | Exon |
|-----------------------|--------------------------------------------------------------------|------------------------|-----------------------------|------|
| Apc                   | Apc-001 (ENSMUST00000079362)                                       | CCDS29125              | TCAGTTGTTAAAGCAAGTTG (AGG)  | 2    |
| Arid1a                | Arid1a-201 (ENSMUST00000105897)                                    | CCDS38908              | TTAGTCCCACCATACGGCTG (AGG)  | 2    |
| Brca1                 | Brca1-001 (ENSMUST00000017290)                                     | CCDS25474              | AAATCTTAGAGTGTCGATC (TGG)   | 2    |
| Brca2                 | Brca2-201 (ENSMUST00000044620)                                     | CCDS39411              | TAGGACCGATAAGCCTCAAT (TGG)  | 3    |
| Cdkn2a (ex1 $\beta$ ) | Cdkn2a-201 (ENSMUST00000107131)                                    | CCDS18350              | TGGTGAAGTTCGTGCGATCC (CGG)  | 1    |
| Cdkn2a (ex2)          | Cdkn2a-001 (ENSMUST00000060501)<br>Cdkn2a-201 (ENSMUST00000107131) | CCDS38812<br>CCDS18350 | GTGCGATATTTGCGTCCGC (TGG)   | 2    |
| Pten                  | Pten-001 (ENSMUST00000013807)                                      | CCDS29753              | GCTAACGATCTCTTTGATGA (TGG)  | 1    |
| Smad4                 | Smad4-001 (ENSMUST00000025393)                                     | CCDS29337              | GACAACCCGCTCATAGTGATA (TGG) | 2    |
| Tet2                  | Tet2-201 (ENSMUST00000098603)                                      | CCDS51071              | GAAAGTGCCAACAGATATCC (AGG)  | 3    |
| Trp53                 | Trp53-202 (ENSMUST00000171247)                                     | CCDS48826              | GACACTCGGAGGGCTTCACT (TGG)  | 4    |
| Arid1b                | Arid1b-201 (ENSMUST00000115797)                                    | CCDS49929              | CTGTGCACCTGGGGACCGT (AGG)   | 2    |
| Arid2                 | Arid2-001 (ENSMUST00000096250)                                     | CCDS37185              | AGGCGCTCCGGACGAGCGG (AGG)   | 1    |
| Arid5b                | Arid5b-201 (ENSMUST00000020106)                                    | CCDS35929              | GCTATGCAAATCGGATCCTT (TGG)  | 2    |
| Atm                   | Atm-001 (ENSMUST00000118282)                                       | CCDS40636              | GGCTGTCAACTTCCGAAAAC (GGG)  | 7    |
| Cdkn2b                | Cdkn2b-201 (ENSMUST00000097981)                                    | CCDS18351              | GGCGCTCCCGAAGCGTTC (AGG)    | 1    |
| Errf1                 | Errf1-001 (ENSMUST00000030811)                                     | CCDS18974              | AAGCTCGGGACAGCGTGAAG (AGG)  | 4    |
| Igsf10                | Igsf10-201 (ENSMUST00000039419)                                    | CCDS50915              | TGAGTCCGTAACGCCTCG (GGG)    | 4    |
| Irf2                  | Irf2-201 (ENSMUST00000034041)                                      | CCDS22295              | GTGCCGAGCCGCATGCATCC (AGG)  | 3    |

**Supplementary Table 7. Primary antibodies used for immunohistochemistry.**

| Antibody       | Company/Source                                                             | Host   | Pretreatment            | Dilution |
|----------------|----------------------------------------------------------------------------|--------|-------------------------|----------|
| A6             | Engelhardt et al., Differentiation; research in biological diversity, 1990 | rat    | Proteinase; 37°C; 10min | 1:100    |
| AFP            | R&D (AF5369)                                                               | goat   | Citrate; 100°C; 30min   | 1:100    |
| Collagen-4     | Cedarlane (CL50451AP)                                                      | rabbit | Proteinase; 37°C; 10min | 1:50     |
| Cytokeratin 19 | Hybridoma bank (TROMAIIIc)                                                 | rat    | EDTA; 100°C; 20min      | 1:500    |
| Ki67           | Neo Markers (Clone SP6)                                                    | rabbit | EDTA; 95°C; 30min       | 1:200    |

**Supplementary Table 8. Primer sequences for target site amplicons.** Primers used for amplifying CRISPR/Cas9 target sites (length of PCR products is between 400bp and 600bp) and oligonucleotides used for amplicon-based next-generation sequencing.

| Guide                                           | Forward primer                                                        | Reverse primer        |
|-------------------------------------------------|-----------------------------------------------------------------------|-----------------------|
| Apc                                             | GCGAATAAGCACCACTCCTC                                                  | AAGAATGAACCAACACCAAGG |
| Arid1a                                          | GTTCTGATTCTGTGCTCGC                                                   | TCCATCACCTACCTGTGTG   |
| Brca1                                           | AGCGTGAGAACTCCTCCAAA                                                  | CTGCCATGAGGAAGAACACA  |
| Brca2                                           | TCACGAGTTTCTCCGTGTCA                                                  | GCTCTGGCTGTCTCGAACTT  |
| Cdkn2a (ex1 $\beta$ )                           | TCTCACCTCGTTGTACAG                                                    | AAGTACTCCATCTCCCGGGA  |
| Cdkn2a (ex2)                                    | TCAACTACGGTGCAGATTCCG                                                 | CGGGTGGGTAATAATGGGAAC |
| Pten                                            | TGCGAGGATTATCCGTCTTC                                                  | CATCCGTCTACTCCACGTT   |
| Smad4                                           | TGCAGTGTACAGATGCTCA                                                   | CTCAGGAAC TGGAGGAAGCA |
| Tet2                                            | CAGATGCTTAGGCCAATCAAG                                                 | AGAAGCAACACATGAAGATG  |
| Trp53                                           | ACATAGCAAGTTGGAGGCCA                                                  | CCACTCACCGTGCACATAAC  |
| Arid1b                                          | AGTTCTGGGGTACTTGGAAATCA                                               | GGTACTGCAAGCCTCCCA    |
| Arid2                                           | ATGACTGAGCCCCGCCA                                                     | GAGCAGACTTTTCCGAGCAG  |
| Arid5b                                          | TGGCTTGACGGACCTTATA                                                   | ATCAGCAGTTGGACGGTCTT  |
| Atm                                             | TCCTTTCAACTGTTCTGTTACA                                                | GACAATGGAAGGCGAGTCA   |
| Cdkn2b                                          | CCGAAGCTACTGGGTCTCC                                                   | CACCTGCCAGCTTGTACG    |
| Errf1                                           | GTGTTCCCCTACTCTGGCTC                                                  | TCTTACAGAGATGGGCACTGG |
| Igsf10                                          | CTGTCCACCTGAGTCCACTT                                                  | TGTCAGCCGGTTTCTTCTA   |
| Irf2                                            | TGTCTGACAGTCGACTTCCC                                                  | ACTGGGAAC TCTGGGATGG  |
| <b>Oligonucleotides for library preparation</b> |                                                                       |                       |
| PE adapter top strand                           | ACACTCTTTCCCTACACGACGCTCTTCCGATCT                                     |                       |
| PE adapter bottom strand                        | GATCGGAAGAGCGGTTACAGCAGGAATGCCGAG                                     |                       |
| PE 1.0                                          | AATGATACGGCGACCACCGAGATCTACACTCTTTCCCTACACGACGCTCTTCCGATCT            |                       |
| iPCRtag                                         | CAAGCAGAAGACGGCATAACGAGATXXXXXXXXCGGTCTCGGCATTCTGCTGAACCGCTCTTCCGATCT |                       |

**Supplementary Table 9. qPCR primers for *hSpCas9* quantification by real time quantitative PCR.**

| Target  | Forward primer       | Reverse primer        |
|---------|----------------------|-----------------------|
| hSpCas9 | GCCTATTCTGTGCTGGTGGT | ATCCCCAGCAGCTTTTAC    |
| Apob    | CACGTGGGCTCCAGCATT   | TCACCAGTCATTTCTGCCTTG |

**Supplementary Table 10. qPCR primers for sgRNA distribution analysis.** Primers used for sgRNA distribution analysis (real time quantitative PCR). *CRISPR-SB-fwd* and *CRISPR-SB-rev* amplify a 763bp product containing the cloned 20bp sgRNA sequence. Nested real time quantitative PCR was performed to analyze distribution of specific sgRNAs using *CRISPR-SB-quant-fwd* and the specific reverse oligonucleotides of each sgRNA.

| Primer                    | Sequence                   |
|---------------------------|----------------------------|
| CRISPR-SB-fwd             | GAGGGCCTATTTCCCATGAT       |
| CRISPR-SB-rev             | CGACTCGGTGCCACTTTT         |
| CRISPR-SB-quant-fwd       | ACTATCATATGCTTACCGTAAC     |
| Apc_rev                   | AAACCAACTTGCTTTAACAACGAC   |
| Arid1a_rev                | AAACGAGCCGTATGGTGGGACTAAC  |
| Brca1_rev                 | AAACGATCGGACACTCTAAGATTTC  |
| Brca2_rev                 | AAACATTGAGGCTTATCGGTCCCTAC |
| Cdkn2a_(ex1 $\beta$ )_rev | AAACGGATCGCACGAACTTCACCAC  |
| Cdkn2a_(ex2)_rev          | AAACGCGGAACGCAAATATCGCAC   |
| Pten_rev                  | AAACTCATCAAAGAGATCGTTAGC   |
| Smad4_rev                 | AAACTATCACTATGAGCGGGTTGTC  |
| Tet2_rev                  | AAACGGATATCTGTTGGCACTTTC   |
| Trp53_rev                 | AAACAGTGAAGCCCTCCGAGTGTC   |

**Supplementary Table 11. qPCR primers used for quantification of *Cdkn2a* exon-1 $\beta$ /exon-2 fusion products by real time quantitative PCR.**

| Target                    | Forward primer         | Reverse primer       |
|---------------------------|------------------------|----------------------|
| Cdkn2a-ex1 $\beta$ -quant | CAAGAGAGGGTTTTCTTGTTGA |                      |
| Cdkn2a-ex2-quant          | ACAACATGTTACGAAAGCCA   | GGGACATCAAGACATCGTGC |

**Supplementary Table 12. Primers used for *CRISPR-SB* integrations analysis.**

| Target        | Forward primer       | Reverse primer     |
|---------------|----------------------|--------------------|
| CRISPR-SB-int | GAGGGCCTATTTCCCATGAT | CGACTCGGTGCCACTTTT |

**Supplementary Table 13. Information about off-target sites.** Location, sequence and number of mismatches (in regard to the on-target) for each potential off-target site analyzed by amplicon-based next-generation sequencing.

| Name               | Chr | Strand | Location (mm9) | Sequence                | Mismatches | Gene         |
|--------------------|-----|--------|----------------|-------------------------|------------|--------------|
| <b>Apc</b>         |     |        |                |                         |            |              |
| OT_Apc_1           | 9   | -1     | 26741476       | TCAGTTATTAAGCAAATTGGGG  | 2          | None         |
| OT_Apc_2           | 14  | 1      | 78004236       | GCAGTTGAGAAAGCAAGTTGGAG | 3          | None         |
| OT_Apc_3           | 3   | -1     | 114079728      | TCAGATTATAAAGCAAGTTGTGG | 3          | None         |
| OT_Apc_4           | 5   | 1      | 76213674       | TTAGCTGTTAAAGCAAGTTACAG | 3          | None         |
| OT_Apc_5           | 10  | 1      | 93842567       | TCAGATGGGAAAGCAAGTTGCAG | 3          | None         |
| OT_Apc_6           | 13  | 1      | 107647475      | TAAGTTGCTATAGCAACTTGAAG | 4          | NM_029665    |
| OT_Apc_7           | 7   | 1      | 13570187       | TCAGTTCCACAGCAAGTTCCAG  | 4          | NM_001168561 |
| OT_Apc_8           | 10  | -1     | 51914804       | AGAGTTCTTAAAGCAAGGTGGAG | 4          | NM_011282    |
| <b>Arid1a</b>      |     |        |                |                         |            |              |
| OT_Arid1a_1        | 17  | 1      | 27589623       | CCAGGCCACCATATGGCTGAGG  | 4          | None         |
| OT_Arid1a_2        | 5   | -1     | 123157730      | TGAGCCCCACTTTACGGCTGCGG | 4          | NM_011026    |
| OT_Arid1a_3        | 8   | 1      | 92089504       | TGGGACCCACCATACCGCTGTGG | 4          | None         |
| OT_Arid1a_4        | 16  | -1     | 13033016       | TTAAACCCACCATACGCCTAAAG | 4          | None         |
| OT_Arid1a_5        | 8   | -1     | 128820603      | ATAGTCCATCCATAGGGCTGAAG | 4          | None         |
| OT_Arid1a_6        | 15  | 1      | 79748335       | TGTGTCCACCACAAGGCTGGAG  | 4          | NM_144811    |
| OT_Arid1a_7        | 1   | 1      | 166141978      | ATAGACCCACCCTTCGGCTGGAG | 4          | NM_007976    |
| <b>Brca1</b>       |     |        |                |                         |            |              |
| OT_Brca1_1         | 18  | 1      | 11328992       | AAATCTTGAGTGTCCGGTCAAG  | 2          | None         |
| OT_Brca1_2         | 10  | -1     | 124791436      | AAATTTTAGTGTGCCATCAAG   | 3          | None         |
| OT_Brca1_3         | 11  | 1      | 111352929      | AATCTTAGAATGTCCATCCAG   | 3          | None         |
| OT_Brca1_4         | 5   | -1     | 34545145       | ACATCTGTGAGTGTCCATCCAG  | 4          | None         |
| OT_Brca1_5         | 3   | -1     | 7612605        | AAGTCTGGGAGTTCCGATCCAG  | 4          | None         |
| OT_Brca1_6         | 17  | 1      | 35264433       | GAACCTTGAGTGTCCGCTCAAG  | 4          | NM_033477    |
| OT_Brca1_7         | 12  | 1      | 112094143      | ACATCTACAGTGTGAGTGGGG   | 4          | NM_001199785 |
| OT_Brca1_8         | 1   | 1      | 60543179       | AAATCTTAAATTGTCTTATCTGG | 4          | NM_001045513 |
| <b>Brca2</b>       |     |        |                |                         |            |              |
| OT_Brca2_1         | 16  | 16     | 7627877        | TATGACCAATGAGCCTCAATAAG | 3          | None         |
| OT_Brca2_2         | 5   | 5      | 37739749       | GATGACCATAAGCCTCAAAGAG  | 4          | NM_145920    |
| OT_Brca2_3         | 7   | 7      | 90824129       | TGGAACAGCTAAGCCTCAATCAG | 4          | None         |
| OT_Brca2_4         | 6   | 6      | 101189127      | TTAGACCTATAAACCTCAATGAG | 4          | None         |
| OT_Brca2_5         | X   | X      | 10413660       | GAGAAGTATTAGCCTCAATAGG  | 4          | None         |
| OT_Brca2_6         | 12  | 12     | 37203260       | AAGGACAGATAAACCTCATTAGG | 4          | NM_178629    |
| OT_Brca2_7         | 5   | 5      | 124269242      | TAGGAACGCTACGGCTCAATAGG | 4          | NM_001042421 |
| <b>Cdkn2a-ex1β</b> |     |        |                |                         |            |              |
| OT_Cdkn2a-ex1β_1   | 8   | 1      | 45813437       | TGATTAAGTTTCGTGAGATCTGG | 3          | None         |
| OT_Cdkn2a-ex1β_2   | 2   | -1     | 30064240       | CAGTGAAGTGCTGCGATCCAG   | 4          | None         |
| OT_Cdkn2a-ex1β_3   | 1   | 1      | 39634432       | TGGGGAAGTTTGTGCGCTCCGGG | 3          | None         |
| OT_Cdkn2a-ex1β_4   | 6   | -1     | 87783496       | AGGTGTGGTGCCTGCGATCCAG  | 4          | None         |
| OT_Cdkn2a-ex1β_5   | 16  | 1      | 39487138       | AAGTGAAGTTTGTGCGTTCCAG  | 4          | None         |
| OT_Cdkn2a-ex1β_6   | 13  | -1     | 50513278       | TGCTGCAGTTCTGCGGGCCAAG  | 4          | NM_175401    |
| OT_Cdkn2a-ex1β_7   | 11  | -1     | 120670835      | TGTGGAAGTTCTGAGATCTGG   | 4          | NM_007988    |
| OT_Cdkn2a-ex1β_8   | X   | 1      | 56172330       | TGGTGAAGTTTCTGAGCTCCAAG | 4          | NM_023774    |
| <b>Cdkn2a-ex2</b>  |     |        |                |                         |            |              |
| OT_Cdkn2a-ex2_1    | 4   | 1      | 148248166      | GTGGGAGATCTGCGTTCCGTAAG | 4          | None         |
| OT_Cdkn2a-ex2_2    | 7   | 1      | 134068454      | GTGCGTTCTTTGCGTTGCGTGGG | 4          | None         |
| OT_Cdkn2a-ex2_3    | 4   | 1      | 45268111       | GTGCCATATCCAGTTCCGCAAG  | 4          | None         |
| OT_Cdkn2a-ex2_4    | 2   | 1      | 180660612      | GTGGGACATTTGGGTTCTCTGG  | 4          | None         |
| OT_Cdkn2a-ex2_5    | 8   | -1     | 74680985       | GTTCAATATTTGTGTTCTGCCAG | 4          | None         |
| OT_Cdkn2a-ex2_6    | 11  | -1     | 95536456       | GTGTGATATTGACGTTCTGCAAG | 4          | NM_008831    |
| OT_Cdkn2a-ex2_8    | 3   | -1     | 53278662       | GTGCGATAGTTGCATGCGGCCGG | 4          | NM_173382    |

| <b>Pten</b>  |    |    |           |                          |   |              |
|--------------|----|----|-----------|--------------------------|---|--------------|
| OT_Pten_1    | 1  | -1 | 98296790  | CCTATCGATTTCTTTGATGATGG  | 3 | None         |
| OT_Pten_2    | 10 | 1  | 11506620  | AATACCGGTCTCTTTGATGATGG  | 4 | None         |
| OT_Pten_3    | 6  | 1  | 110090641 | TGTCACGATGTCTTTGATGAAGG  | 4 | None         |
| OT_Pten_4    | 1  | -1 | 148546230 | GCTTACGATGTATTTGATGATGG  | 3 | None         |
| OT_Pten_5    | 12 | -1 | 8417202   | AGTAGCTATCTCTTTGATGAGAG  | 4 | None         |
| OT_Pten_6    | 2  | 1  | 37283155  | TGTAACAATGTCTTTGATGAAAG  | 4 | NM_146253    |
| OT_Pten_7    | 3  | 1  | 138114184 | GCTGACACTGTCTTTGATGATAG  | 4 | NM_007410    |
| OT_Pten_8    | 10 | -1 | 62480288  | GGAAACGATGGCTTTGATGACAG  | 4 | NM_001079824 |
| <b>Smad4</b> |    |    |           |                          |   |              |
| OT_Smad4_1   | 18 | 1  | 39860049  | AATAGCAGCTCATAGTGATAGAG  | 4 | None         |
| OT_Smad4_2   | 6  | -1 | 127173197 | ATAACCCGCTTATAGTGATGTGG  | 3 | None         |
| OT_Smad4_3   | 8  | -1 | 88373851  | ACAGCCCTTACATAGTGATAGGG  | 4 | None         |
| OT_Smad4_4   | 13 | 1  | 31227591  | ACAACATCTCCTAGTGATATGG   | 4 | None         |
| OT_Smad4_5   | 1  | 1  | 170162378 | GAAACCAGCTCAAAGTGATAGAG  | 4 | None         |
| OT_Smad4_6   | 10 | 1  | 20868341  | ACTATCTGCTCAAAGTGATACGG  | 4 | NM_001198914 |
| <b>Tet2</b>  |    |    |           |                          |   |              |
| OT_Tet2_1    | 9  | 1  | 45417670  | TAGTGTGACAACAGATATCCTGG  | 4 | None         |
| OT_Tet2_2    | 2  | 1  | 30832627  | GATTATGACAACAGATATCCTGG  | 4 | None         |
| OT_Tet2_3    | 1  | 1  | 89767330  | GGAATTGCCAACAGATCTCCTGG  | 3 | None         |
| OT_Tet2_4    | 17 | 1  | 30344787  | GCCAGTGCCAACAGATTTCCAG   | 3 | None         |
| OT_Tet2_5    | 13 | -1 | 51963540  | GAAAGACCTACAGATATCCAG    | 3 | None         |
| OT_Tet2_6    | 7  | -1 | 115756426 | GACAGTGCCAACAGATATAGTGG  | 3 | NM_001011871 |
| OT_Tet2_7    | 10 | 1  | 5219200   | GAACGTGCTTACAGATATCAAAG  | 4 | NM_001079686 |
| OT_Tet2_8    | 4  | 1  | 132622017 | GACACTGCCTACAGGTATCCAGG  | 4 | NM_146155    |
| <b>Trp53</b> |    |    |           |                          |   |              |
| OT_Trp53_1   | 17 | -1 | 54559163  | AACACTGGAGGGCTTCACTTGG   | 2 | None         |
| OT_Trp53_2   | 5  | -1 | 107143107 | ATCACTTGGAGGGCTTCACTCAG  | 3 | None         |
| OT_Trp53_3   | 10 | -1 | 109084970 | GGCTGTCAGAGGGCTTCACTCAG  | 4 | None         |
| OT_Trp53_4   | 9  | -1 | 49608135  | GTCTGTGAGAGGGCTTCACTGAG  | 4 | None         |
| OT_Trp53_5   | 5  | -1 | 117474920 | CACACTGGGAAGGGCTTCACTTAG | 3 | None         |
| OT_Trp53_6   | 2  | -1 | 35586131  | GGCAGTCAGAGGTCTTCACTCAG  | 4 | NM_001114125 |
| OT_Trp53_7   | 2  | -1 | 62339193  | GACAGTCTGAAGGGCTTCACTGG  | 4 | NM_007986    |
| OT_Trp53_8   | 2  | -1 | 158087116 | AACACTCGGAGGCCATCACTGGG  | 3 | NM_177850    |

**Supplementary Table 14. Primer sequences for off-target site amplicons.** Primers used for amplifying CRISPR/Cas9 off-target sites (length of PCR products is between 400bp and 450bp).

| Name               | Forward primer            | Reverse primer           |
|--------------------|---------------------------|--------------------------|
| <b>Apc</b>         |                           |                          |
| OT_Apc_1           | CTGAGTGTGGTCTATACTCAAG    | ACTAGGATTAGGACCTAGGAAACA |
| OT_Apc_2           | AGATCTGCAGTTCACCCCAA      | GGGAGTCCAGGAAGCAGAAT     |
| OT_Apc_3           | AGTTACTGGTGGCTGTAAGACA    | AGAGTGGCAGTTC AAGGTAGT   |
| OT_Apc_4           | ATCCAACGCTGATTCCTTGC      | GGGAGGTGATTGAGAGGGAC     |
| OT_Apc_5           | CCTGGTTTTACGTTGCTGCT      | CTATTTGCCTGCACCTCCAG     |
| OT_Apc_6           | CAATGCAAAAGGTGTTCTGACA    | TCACCACCCTTGCTGTA ACT    |
| OT_Apc_7           | CACTTGCTTCAGTCTGAGCC      | CCTGCAGTCAACCTTGGTTTC    |
| OT_Apc_8           | CGAACCTGTCAAGTTCGAAGT     | TGCATGTTCTGGGCTATCT      |
| <b>Arid1a</b>      |                           |                          |
| OT_Arid1a_1        | TCCAGATGCCAACCCCTATC      | GCCACAGACCCATTTCCTCA     |
| OT_Arid1a_2        | TGAGAGGGTCACGAGTTGG       | CTATTGCCCCAGACCCAGAG     |
| OT_Arid1a_3        | TGTCTACGATCACAGTGCAGT     | ACACAGGCTGTA ACTCTGAAGA  |
| OT_Arid1a_4        | CAGAGGAAGTTGGGTGAGGA      | TCATGCTCATCAGGGCTTCT     |
| OT_Arid1a_5        | GCCAACAGGTGAGTCTTAAC      | CAGGCCATGTTGTCTGAAG      |
| OT_Arid1a_6        | CGCAAGTTCGTTTGTGCT        | GTCTGGTCTCATCTCCTGG      |
| OT_Arid1a_7        | TCCTCGAAGTAGACATATCCACA   | TGCAAAAGGTTCTTCTGGAGC    |
| <b>Brca1</b>       |                           |                          |
| OT_Brca1_1         | GACTTCGTGGACAGAATGGC      | TCCAGCCCTGTTTGATTCTCT    |
| OT_Brca1_2         | GAGAACTGCAGAGCCATTG       | ACCGACATTTTCCCTCCTT      |
| OT_Brca1_3         | TCCAAAGGCTGCTAGTGGAA      | CCTCGACCCCTCCCAATTTT     |
| OT_Brca1_4         | CCCAACACAGCCCACTACA       | ACCTGCAGAGTAAAGGGCTC     |
| OT_Brca1_5         | TGGATTCCAGCCTCTGTCAA      | TGTCCCTAGCCAGTACCTCT     |
| OT_Brca1_6         | TAGCAGGGACCTCAAAGTGG      | ATAGCAGCCCATGAAGCCAG     |
| OT_Brca1_7         | GCACTGTAAGCTCAACCCAG      | CCTCTGCCACATGAGTACCA     |
| OT_Brca1_8         | ACATGACTGGAGTTAGAAAAGGA   | TGTGCTTGCTATTCTATGATGA   |
| <b>Brca2</b>       |                           |                          |
| OT_Brca2_1         | CACAGTAGGTTGGGTCTTCC      | GACAGGGTTGGAGAGTGCC      |
| OT_Brca2_2         | GCGCTGTTATTTCTCCGTT       | AGCAAGGCCAGTGTCTCAT      |
| OT_Brca2_3         | TGAGCAAGTCACTTTGGA AAAACA | AAGTGGGAACCTCAGAGGG      |
| OT_Brca2_4         | CACTGAGTGTATGCTTGGC       | ACTAGTGAAGCCCTGCCTTTC    |
| OT_Brca2_5         | GACACAGGAAGAGGGAGACA      | ATCAAGCCACCAGAATCCCT     |
| OT_Brca2_6         | TGCATTTCTTTGACACCAGT      | ATCAGAGATCTCCGTGGCTG     |
| OT_Brca2_7         | AGAAGGAATTTGGGATTTTGCA    | TGGAGAGTGAGCTAGCCAAG     |
| <b>Cdkn2a-ex1β</b> |                           |                          |
| OT_Cdkn2a-ex1β_1   | GCTTCCCTGAAACCTGCATC      | CATCAAGGACTAGGAGCAATGA   |
| OT_Cdkn2a-ex1β_2   | GTTGCCCTCATCTCAGACCT      | TTCCAAGTGCAGCAAAAGGTC    |
| OT_Cdkn2a-ex1β_3   | GCGACTCACTCCAGGCTG        | ACAAAAGGCATCTGGACA ACT   |
| OT_Cdkn2a-ex1β_4   | GGGGAGAGGGTCTAGAAAGGA     | TCCACAGATCATTGGCGAGA     |
| OT_Cdkn2a-ex1β_5   | GGCATCTTTTCATTTGTAGCC     | ACACAGACACACAGATCCAAT    |
| OT_Cdkn2a-ex1β_6   | ACTTCAGTGATCGCTAGGCC      | CACACAGTGGGGCATAGAGA     |
| OT_Cdkn2a-ex1β_7   | TGAGGACATGCACACAGACT      | AATGCTTGGCTGGGTGATTG     |
| OT_Cdkn2a-ex1β_8   | CTGCAGAGAGTTCCAGGAA       | CTCTTCATTGCTGATCCGCC     |
| <b>Cdkn2a-ex2</b>  |                           |                          |
| OT_Cdkn2a-ex2_1    | TGGGCTTGTTTTAAAGGGGC      | CAATGTCTGCTGCTCACCTG     |
| OT_Cdkn2a-ex2_2    | GTCTGTTTGGATGCCCTTGG      | AGGCTACTCTTGCTGTCTCC     |
| OT_Cdkn2a-ex2_3    | AAACTGAACTTGCTCGGCTC      | TTGAGCATGAGAGGGAAGCA     |
| OT_Cdkn2a-ex2_4    | TACCACTTCTTCCCTGCAG       | ATTGACTGTCTACCTGGG       |
| OT_Cdkn2a-ex2_5    | TTACCTAACTCCTGGGGCAG      | CAGGAAGCTAGACTGTGCCT     |
| OT_Cdkn2a-ex2_6    | CCATCCTGTCAAGTGGTTCTT     | GCTACCTACCCACCACACTC     |
| OT_Cdkn2a-ex2_7    | ACTGGGGCATCTTCAGTCTC      | AGTGAAAAGCCCAATGATAAGT   |
| <b>Pten</b>        |                           |                          |
| OT_Pten_1          | CAAGAGAAAGACAAGGCATGGT    | AGAAGGGAGGAGGGGAAGGAA    |
| OT_Pten_2          | GGAGCAGCTTGAGGTCTGAT      | CATTGCCAGCAGATTCTCA      |
| OT_Pten_3          | GGAACATTAAGAGTGAAACAGCT   | AAATAGGTGGCAGAACGGGT     |
| OT_Pten_4          | CATGCAACAACAGAGGACACA     | TCCTTCTCTGACCAAAATGTGA   |
| OT_Pten_5          | AACAATGCTCAGAGGGTCCC      | GATGGAATGTTGGGCCTCAA     |
| OT_Pten_6          | AAGGGTGGACTACAAAAGAGC     | ACAGAAAAGGTTGTCTTGCC     |
| OT_Pten_7          | GCTGTGGTATTTCAACTGGCT     | TGACCTTACGTTGCCAATG      |
| OT_Pten_8          | CCATAGCCATGTCTCCCAT       | GCTGCAACATTAATGAAGAAGC   |

| <b>Smad4</b> |                        |                       |
|--------------|------------------------|-----------------------|
| OT_Smad4_1   | CATCATCTCCAAGGCCCTCA   | GCCATTCCAGGGATCAAACC  |
| OT_Smad4_2   | CAGATATGGTGGTGCATGCC   | TTGGAAAGCAGAGCAACAGG  |
| OT_Smad4_3   | GGGGTTCTTGGGAGTCTTTT   | TACTGTGGCCTTGAGAAGCA  |
| OT_Smad4_4   | TAAGCAGCACTCACCACCAA   | GCTCAGTCACCTAAGCTTGT  |
| OT_Smad4_5   | AAAGTGGGACTCATAGGGCC   | TCCCGTCTCAGGTCACAAAA  |
| OT_Smad4_6   | TAATGCCTGCTGTCCCTTCA   | TGAGATCATCTGACGGGCAA  |
| <b>Tet2</b>  |                        |                       |
| OT_Tet2_1    | AATTCAAGTGACAGGCCAGG   | GCCAGTCTGCAAATGAAATCT |
| OT_Tet2_2    | CAACACACCTGCCTCCAAC    | CTGAGTTCACTGTGCAAGCA  |
| OT_Tet2_3    | TCTAGGGAATGTGGCCTGAG   | CCCTGCAGATCCCCTAAATGA |
| OT_Tet2_4    | CCGCACCCATTTCTGATAGG   | CTTCCGGTCCAGTTTCACC   |
| OT_Tet2_5    | GCTGTCTGGAACCTCACTCT   | ACTGAGCCTAAGATTGTCCCA |
| OT_Tet2_6    | TAATGCATCCTCCTTCACCCT  | GGGGTTCAACATGGGGATCA  |
| OT_Tet2_7    | ACATGACCCAAGATTCCCAA   | GGCCTGAGAAGCGAAATGAG  |
| OT_Tet2_8    | CTATGAAGGCAAGGTGGGC    | CATCCCCAGACTTACCCAGG  |
| <b>Trp53</b> |                        |                       |
| OT_Tp53_1    | CCTAGCATTACGGCCCTCAT   | TGAGGGGAGGAGAGTACAGT  |
| OT_Tp53_2    | GGATTGTCCCTTGTACCACTTC | AACAAATGTGCGGGCAACTT  |
| OT_Tp53_3    | GCATGCACTGAACAGAAATTGG | TCAGAGGAGATTTGCTTGGGA |
| OT_Tp53_4    | CCCTGGCTCTTCTGTGTGTA   | GAACCCGACGATGTGATAG   |
| OT_Tp53_5    | CATGATGCCTGTTACAGAGG   | CTGGTAAAAGGTGCTGGCTT  |
| OT_Tp53_6    | CATGCTGTTTGGGTGGAAGG   | AGAAAAGAGGGGCTGGTTCC  |
| OT_Tp53_7    | CTACCCGCAATGAACAGGT    | CCAAGTGGCCAAGAAGCAA   |
| OT_Tp53_8    | GGCTTGCCGCTTTTGTGAT    | AAGTGGACAGTTCTCCAGC   |
